# Supplementary material
Source: publisher figshare collection journal article supplement (https://acs.figshare.com/ndownloader/files/24693617)

## Supporting Information

### Total Synthesis of (–)-Sigillin A: A Poly-Chlorinated and Poly-Oxygenated Natural Product

Yousuke Yamaoka,\* Takamori Nakayama, Shota Kawai, and Kiyosei Takasu\*

Graduate School of Pharmaceutical Sciences, Kyoto University,  
Yoshida, Sakyo-ku, Kyoto 606-8501, Japan  
yyamaoka@pharm.kyoto-u.ac.jp

#### Table of Contents

|                                                                                       |           |
|---------------------------------------------------------------------------------------|-----------|
| <b>1. General Methods .....</b>                                                       | <b>2</b>  |
| <b>2. Experimental Procedures and Characterization Data for New Compounds.....</b>    | <b>2</b>  |
| <b>3. Comparison of NMR Spectroscopic Data Natural and Synthetic Sigillin A .....</b> | <b>12</b> |
| <b>4. Optimization Conditions of Allylation.....</b>                                  | <b>13</b> |
| <b>5. Optimization Conditions of Rubottom Oxidation.....</b>                          | <b>14</b> |
| <b>6. X-ray Crystallographic Data.....</b>                                            | <b>16</b> |
| <b>7. <sup>1</sup>H and <sup>13</sup>C NMR Spectra of New Compounds .....</b>         | <b>22</b> |

## 1. General Methods

Dehydrated solvents for the reactions were purchased and used without further desiccation. For reactions that require heating, oil bath was used as a heat source. Reactions were monitored by thin-layer chromatography (TLC) carried out on Wako TLC silica gel 70 F<sub>254</sub>. Column chromatography was performed using Fuji Silysia BW-200 silica gel with visualization by ultraviolet (UV) irradiation at 254 nm and/or indicated stains. Nuclear magnetic resonance (NMR) spectra were recorded on a JEOL JNM-LA (500 MHz for <sup>1</sup>H and 125 MHz for <sup>13</sup>C). Chemical shifts are presented in ppm relative to tetramethylsilane (<sup>1</sup>H, 0.00) or solvents as follows: CDCl<sub>3</sub> (<sup>13</sup>C, 77.0); acetone-*d*<sub>6</sub> (<sup>1</sup>H, 2.04; <sup>13</sup>C, 29.8); DMSO-*d*<sub>6</sub> (<sup>1</sup>H, 2.49; <sup>13</sup>C, 39.5). The following abbreviations were used to explain NMR peak multiplicities: s = singlet, d = doublet, t = triplet, q = quartet, m = multiplet, br = broad. High-resolution mass spectra (HRMS) were recorded on a JEOL MS700 spectrometer (FAB), a SHIMADZU LCMS-IT-TOF fitted with an ESI. IR experiments were recorded on a SHIMADZU IRAffinity-1 spectrometer. The wave numbers of maximum absorption peaks of IR spectroscopy are presented in cm<sup>-1</sup>. Optical rotations were recorded on JASCO P-2000 polarimeter. All melting points were determined using a Yamato MP-21 melting point apparatus and are uncorrected. X-ray diffraction data were recorded on a RIGAKU R-AXIS RAPID system.

## 2. Experimental Procedures and Characterization Data for New Compounds

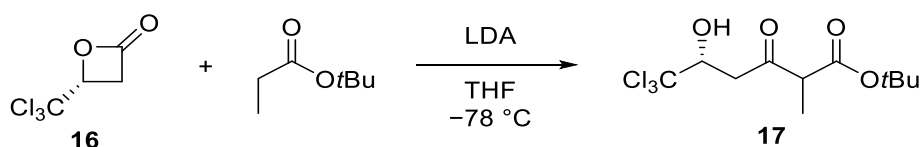

**5-Hydroxy-3-oxoester 17:** A solution of LDA was prepared by adding *n*-BuLi (104.0 mL, 240 mmol, 2.3 M in cyclohexane) to a solution of diisopropylamine (34.0 mL, 240 mmol) in THF (500 mL) at -78 °C. After being stirred for 30 min, *tert*-butyl propionate (36.0 mL, 240 mmol) in THF (50 mL) was added dropwise to the solution of LDA and stirring was continued for 30 min at -78 °C. Then a solution of (*R*)-4-trichloromethyl-2-oxetanone, which was prepared according literature<sup>1</sup>, (15.2 g, 80 mmol) in THF (40 mL) was added in one portion and the mixture was stirred at -78 °C for 30 min. The reaction was quenched with saturated aqueous NH<sub>4</sub>Cl (400 mL). The organic layer was separated, and the aqueous layer was extracted with diethyl ether (200 mL × 2). The combined organic layers were washed with brine (50 mL), dried with MgSO<sub>4</sub>, filtered, and concentrated under reduced pressure. The residue was purified by column chromatography

<sup>1</sup> Ganta, A.; Shamshina, J. L. Cafiero, L. R. Snowden, T. S. *Tetrahedron*, **2012**, 68, 5396–5405.

on silica gel (hexane/Et<sub>2</sub>O) to afford product **17** as a mixture of diastereomers (20.9 g, 82%). The mixture was recrystallized with hexane/Et<sub>2</sub>O at –78 °C to afford single diastereomer of **17** (18.9 g) as white solids; mp 75–77 °C (hexane/Et<sub>2</sub>O); *R<sub>f</sub>* = 0.23 (25% Et<sub>2</sub>O/hexane, hanessian); <sup>1</sup>H NMR (CDCl<sub>3</sub>, 500 MHz): δ 4.71 (dd, *J* = 5.1, 5.1 Hz, 1H), 3.51 (br s, 1H), 3.50 (q, *J* = 6.6 Hz, 1H), 3.16 (d, *J* = 5.7 Hz, 2H), 1.48 (s, 9H), 1.35 (d, *J* = 6.9 Hz, 3H); <sup>13</sup>C NMR (CDCl<sub>3</sub>, 125 MHz): δ 203.1, 169.0, 102.4, 82.6, 78.5, 54.4, 43.4, 27.9, 12.4. Spectroscopic properties were consistent with those reported in the literature.<sup>2</sup>

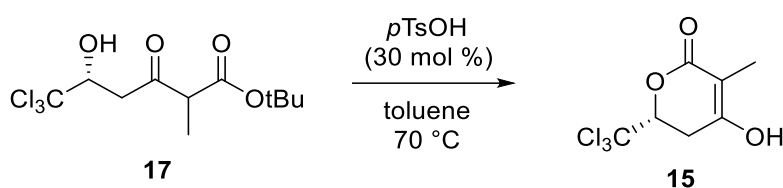

**β-Keto-δ-valerolactone 15:** To a stirred solution of **17** (13.8 g, 43.2 mmol) in toluene (800 mL) was added *p*TSA·H<sub>2</sub>O (2.47 g, 13.0 mmol). After being stirred at 70 °C for 6 h, the resulting mixture was cooled to 23 °C. The organic layer was extracted with saturated aqueous NaHCO<sub>3</sub> (100 mL × 6). The aqueous layers were combined and neutralized by 10% aqueous HCl. The aqueous solution was extracted with AcOEt (100 mL × 4). The combined organic layers were washed with water (50 mL), followed by brine (50 mL), dried over MgSO<sub>4</sub>, filtered, and concentrated under reduced pressure to afford product **15** (8.24 g, 78%) as white solids. *R<sub>f</sub>* = 0.25 (10% MeOH/CHCl<sub>3</sub>, UV, cerium sulfate); mp 158–162 °C (AcOEt/hexane); [*α*]<sub>D</sub><sup>23</sup> = +54.7 (*c* = 1.00, acetone); <sup>1</sup>H NMR (500 MHz, DMSO-*d*<sub>6</sub>) δ 11.2 (br s, 1H), 5.18 (dd, *J* = 11.6, 4.4 Hz, 1H), 2.94 (dd, *J* = 16.9, 4.3 Hz, 1H), 2.83 (m, 1H), 1.65 (s, 3H); <sup>13</sup>C NMR (125 MHz, DMSO-*d*<sub>6</sub>) δ 165.7, 163.9, 98.4, 96.7, 80.9, 29.2, 8.6; IR (neat) *v*<sub>max</sub>: 3190, 1743, 1654, 1396, 1373, 1338, 1246, 1095, 1049, 802 cm<sup>–1</sup>; HRMS (ESI) *m/z*: [*M* + Na]<sup>+</sup> Calcd for C<sub>7</sub>H<sub>7</sub>Cl<sub>3</sub>O<sub>3</sub>Na 266.9353; found 266.9351.

<sup>2</sup> Schmidt, W.; Schulze, T. M.; Brasse, G.; Nagrodzka, E.; Maczka, M.; Zettel, J.; Jones, P. G.; Grunenberger, J.; Hilker, M.; Trauer-Kizilelma, U.; Braun, U.; Schulz, S. *Angew. Chem., Int. Ed.*, **2015**, *54*, 7698–7702.

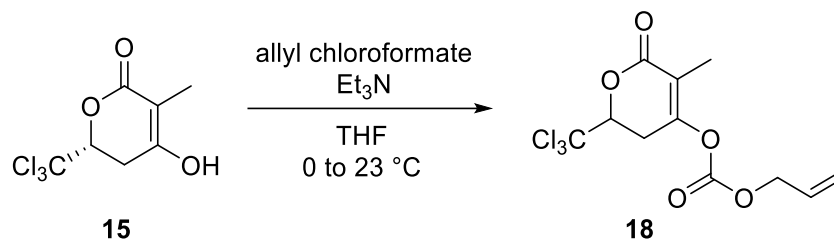

**Allyl carbonate 18:**<sup>3</sup> To a stirred solution of **15** (4.5 g, 18.3 mmol) and triethylamine (6.5 mL, 45.8 mmol) in THF (90 mL) was slowly added allyl chloroformate (3.9 mL, 36.7 mmol) at 0 °C. After being stirred at 23 °C for 3 h, the reaction was quenched by the addition of saturated aqueous NH<sub>4</sub>Cl. The organic layer was separated, and the aqueous layer was extracted with AcOEt (100 mL). The combined organic layers were washed with brine (20 mL), dried over MgSO<sub>4</sub>, filtered, and concentrated under reduced pressure. The residue was purified by column chromatography on silica gel (hexane/AcOEt) to afford product **18** (6.0 g, 99%) as a colorless oil.  $R_f$  = 0.25 (10% AcOEt/hexane, UV);  $[\alpha]_D^{23}$  = +39.0 ( $c$  = 1.03, acetone); <sup>1</sup>H NMR (CDCl<sub>3</sub>, 500 MHz):  $\delta$  5.98 (ddt,  $J$  = 17.1, 10.6, 6.0 Hz, 1H), 5.44 (ddd,  $J$  = 17.2, 2.6, 1.2 Hz, 1H), 5.38 (ddd,  $J$  = 10.5, 2.0, 1.0 Hz, 1H), 4.93 (dd,  $J$  = 11.9, 4.2 Hz, 1H), 4.75 (ddd,  $J$  = 6.0, 1.2, 1.2 Hz, 2H), 3.20 (ddq,  $J$  = 17.2, 12.1, 2.3 Hz, 1H), 3.08 (ddd,  $J$  = 17.3, 4.2, 1.2 Hz, 1H), 1.90 (dd,  $J$  = 2.6, 1.2 Hz, 3H); <sup>13</sup>C NMR (CDCl<sub>3</sub>, 125 MHz):  $\delta$  163.6, 155.4, 150.7, 130.2, 120.5, 116.0, 97.0, 82.8, 70.1, 28.7, 9.9; IR (neat)  $\nu_{\text{max}}$ : 2990, 1763, 1736, 1223, 1138, 937, 802 cm<sup>-1</sup>; HRMS (FAB)  $m/z$ :  $[M + H]^+$  Calcd for C<sub>11</sub>H<sub>12</sub>Cl<sub>3</sub>O<sub>5</sub> 328.9750; found 328.9744.

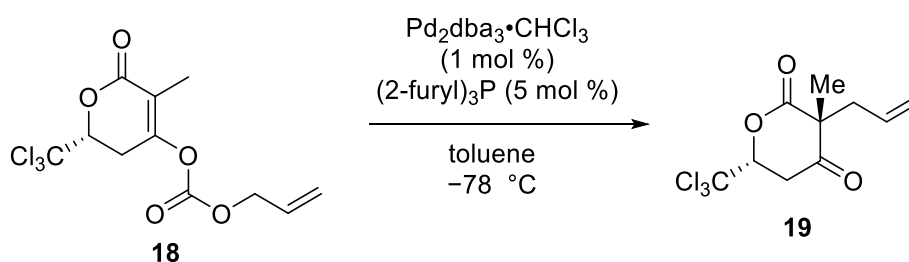

**Allylated β-keto-δ-valerolactone 19:** A solution of Pd<sub>2</sub>dba<sub>3</sub>·CHCl<sub>3</sub> (72.0 mg, 0.14 mmol, 1 mol % based on Pd) and tri(2-furyl)phosphine (162 mg, 0.70 mmol) in toluene (135 mL) was stirred for 10 min at 23 °C. Then, a solution of **18** (4.50 g, 13.7 mmol) in toluene (10 mL) was slowly added to the mixture at -78 °C. After the mixture was gradually warmed up to 23 °C, the solvent was evaporated. The residue was purified by column chromatography on silica gel (hexane/AcOEt) to afford product **19** (3.79 g, 96%, dr = 94:6 based on the crude <sup>1</sup>H NMR, concomitant with a small amount of dibenzylideneacetone) as a colorless oil.  $R_f$  = 0.28 (10%

<sup>3</sup> Prantz, K.; Mulzer, J. *Chem. Eur. J.* **2010**, *16*, 485–506.

AcOEt/hexane, anisaldehyde);  $^1\text{H}$  NMR ( $\text{CDCl}_3$ , 500 MHz):  $\delta$  5.61–5.73 (m, 1H), 5.18–5.08 (m, 2H), 4.92 (dd,  $J$  = 11.9, 2.9 Hz, 1H), 3.29 (dd,  $J$  = 16.3, 2.9 Hz, 1H), 2.84–2.75 (m, 2H), 2.60 (dd,  $J$  = 13.5, 8.3 Hz, 1H), 1.48 (s, 3H);  $^{13}\text{C}$  NMR ( $\text{CDCl}_3$ , 125 MHz):  $\delta$  202.8, 170.5, 131.3, 120.7, 97.3, 81.1, 56.1, 41.6, 41.2, 22.7; IR (neat)  $\nu_{\text{max}}$ : 2982, 2924, 1767, 1721, 1454, 1225, 1134, 795  $\text{cm}^{-1}$ ; HRMS (FAB)  $m/z$ :  $[\text{M} + \text{H}]^+$  Calcd for  $\text{C}_{10}\text{H}_{12}\text{Cl}_3\text{O}_3$  284.9852; found 284.9858.

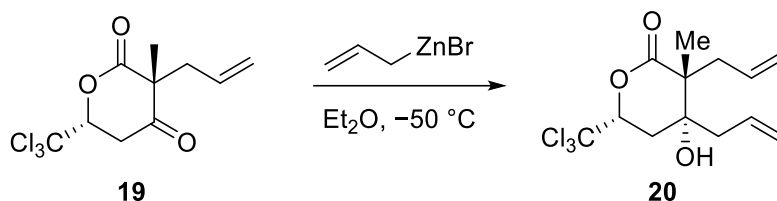

**Diallyl 20:** To a stirred solution of **19** (4.02 g, 14.1 mmol) in  $\text{Et}_2\text{O}$  (144 mL) was added a 1.25 M THF solution of allylzinc bromide<sup>4</sup> (23.0 mL, 28.8 mmol) at  $-50\text{ }^\circ\text{C}$ . After being stirred at  $-50\text{ }^\circ\text{C}$  for 30 min, the solution was quenched with 3% aqueous HCl. The organic layer was separated, and the aqueous layer was extracted by AcOEt (50 mL  $\times$  2). The combined organic layers were washed with brine (20 mL), dried over  $\text{MgSO}_4$ , filtered, and concentrated under reduced pressure. Directly recrystallization of (hexane/AcOEt) of the obtained crude mixture (dr = 94:6) afforded the desired product **20** as a single diastereomer (3.61 g, 78%) as white solids.  $R_f$  = 0.32 (20% AcOEt/hexane, potassium permanganate); mp 148–152  $^\circ\text{C}$  (hexane/AcOEt);  $[\alpha]_{\text{D}}^{23}$  =  $-45.3$  ( $c$  = 1.00, acetone);  $^1\text{H}$  NMR (500 MHz,  $\text{CDCl}_3$ )  $\delta$  6.02–5.82 (m, 2H), 5.32 (ddd,  $J$  = 10.2, 1.2, 1.2 Hz, 1H), 5.26 (ddd,  $J$  = 17.0, 1.6, 1.3 Hz, 1H), 5.21–5.11 (m, 2H), 4.63 (dd,  $J$  = 11.3, 5.6 Hz, 1H), 2.65–2.56 (m, 3H), 2.46 (dd,  $J$  = 14.1, 5.5 Hz, 1H), 2.36 (ddd,  $J$  = 14.0, 11.2, 1.7 Hz, 1H), 2.13 (dd,  $J$  = 14.6, 8.3 Hz, 1H), 2.14 (br m, 1H), 1.29 (s, 3H);  $^{13}\text{C}$  NMR (125 MHz,  $\text{CDCl}_3$ )  $\delta$  172.4, 133.4, 131.6, 120.7, 119.3, 98.8, 82.9, 73.3, 51.0, 41.4, 39.2, 31.4, 15.7; IR (neat)  $\nu_{\text{max}}$ : 3472, 3082, 2978, 1728, 1196, 1115, 1022, 999, 914, 814, 783  $\text{cm}^{-1}$ ; HRMS (FAB)  $m/z$ :  $[\text{M} + \text{H}]^+$  Calcd for  $\text{C}_{13}\text{H}_{18}\text{Cl}_3\text{O}_3$  327.0322; found 327.0326.

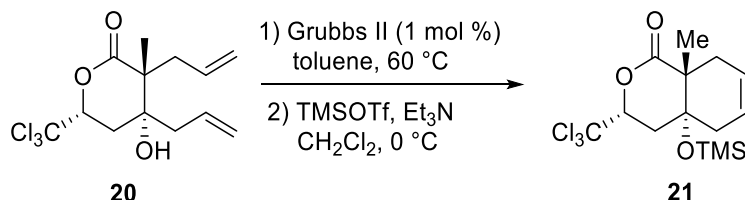

**Hexahydroisocoumarin 21:** To a stirred solution of **20** (4.8 g, 14.7 mmol) in toluene (150 mL) was added Grubbs 2<sup>nd</sup> catalyst (124 mg, 0.15 mmol) in one portion. After being stirred at 60  $^\circ\text{C}$

<sup>4</sup> McNulty, J.; McLeod, D. *Eur. J. Org. Chem.* **2017**, 29–33.

for 1 h, the reaction mixture was cooled down to 23 °C, and the volatile was removed under reduced pressure. And then, the crude was dissolved in CH<sub>2</sub>Cl<sub>2</sub> (150 mL) and triethylamine (10.0 mL, 73.3 mmol) and TMSOTf (8.0 mL, 44.0 mmol) successively added to the mixture at 0 °C. After being stirred at 23 °C for 2.5 h, the solution was quenched with water (50 mL). The organic phase was separated and washed with brine (20 mL), dried over MgSO<sub>4</sub>, filtered, and concentrated under reduced pressure. The residue was purified by silica gel column chromatography (hexane/AcOEt) to afford product **21** (5.1 g, 94%) as white solids. R<sub>f</sub> = 0.50 (20% AcOEt/hexane, potassium permanganate); mp 178–180 °C (hexane/CHCl<sub>3</sub>); [ $\alpha$ ]<sub>D</sub><sup>23</sup> = –71.4 (*c* = 0.135, acetone); <sup>1</sup>H NMR (500 MHz, CDCl<sub>3</sub>)  $\delta$  5.78–5.67 (m, 1H), 5.57–5.47 (m, 1H), 5.00 (dd, *J* = 8.3, 8.3 Hz, 1H), 2.70 (br d, *J* = 18.0 Hz, 1H), 2.55–2.46 (m, 1H), 2.47 (dd, *J* = 14.9, 8.0 Hz, 1H), 2.30 (dd, *J* = 14.6, 8.3 Hz, 1H), 2.35–2.23 (m, 1H), 2.14 (dd, *J* = 17.9, 5.3 Hz, 1H), 1.21 (s, 3H), 0.08 (s, 9H); <sup>13</sup>C NMR (125 MHz, CDCl<sub>3</sub>)  $\delta$  173.6, 125.2, 121.7, 99.2, 81.9, 73.9, 45.1, 37.4, 36.2, 31.8, 17.0, 1.8; IR (neat)  $\nu_{\text{max}}$ : 3036, 2943, 2920, 1740, 1389, 1292, 1250, 1227, 1146, 1111, 1076, 1076, 1011, 833, 787, 725 cm<sup>–1</sup>; HRMS (FAB) *m/z*: [M + H]<sup>+</sup> Calcd for C<sub>14</sub>H<sub>22</sub>Cl<sub>3</sub>O<sub>3</sub>Si 371.0404; found 371.0407.

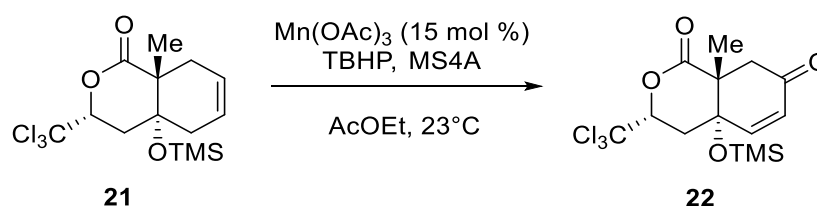

**Enone 22:**<sup>5</sup> To a stirred solution of **21** (5.0 g, 13.5 mmol) in AcOEt (50 mL) were added MS 4A (10.0 g) and a solution of TBHP (5.0-6.0 M in decaline, 13.5 mL). After being stirred at 23 °C for 30 min, Mn(OAc)<sub>3</sub>·2H<sub>2</sub>O (540 mg, 2.0 mmol) was added to the mixture. The solution was degassed and filled with O<sub>2</sub> (ballon). After being stirred at 23 °C under O<sub>2</sub> for 120 h, the reaction mixture was filtered through a thin pad of Celite<sup>®</sup>, and concentrated under reduced pressure. The residue was purified by silica gel column chromatography (hexane/AcOEt) to afford enone **22** (4.2 g, 81%) as white solids. *R*<sub>f</sub> = 0.12 (20% AcOEt/hexane, UV, potassium permanganate); mp 149–153 °C (hexane/CHCl<sub>3</sub>); [*α*]<sub>D</sub><sup>23</sup> = +47.6 (*c* = 1.00, acetone); <sup>1</sup>H NMR (500 MHz, CDCl<sub>3</sub>) δ 6.72 (d, *J* = 9.7 Hz, 1H), 6.13 (dd, *J* = 9.9, 1.0 Hz, 1H), 5.13 (dd, *J* = 8.7, 6.7 Hz, 1H), 3.14 (dd, *J* = 17.2, 1.2 Hz, 1H), 2.71 (d, *J* = 17.2 Hz, 1H), 2.59 (dd, *J* = 14.9, 6.9 Hz, 1H), 2.45 (dd, *J* = 14.8, 8.7 Hz, 1H), 1.31 (d, *J* = 1.2 Hz, 3H), 0.11 (s, 9H); <sup>13</sup>C NMR (125 MHz, CDCl<sub>3</sub>) δ 196.8, 170.6, 143.7, 130.7, 98.8, 81.9, 72.0, 49.2, 42.9, 35.6, 17.9, 1.9; IR (neat) *ν*<sub>max</sub>: 2963, 2924, 2851,

<sup>5</sup> (a) Shing, T. K. M.; Yeung, Y.-Y.; Su, P. L. *Org. Lett.* **2006**, *8*, 3149–3151. (b) Kumaran, R. S.; Mehta, G. *Tetrahedron* **2015**, *71*, 1547–1554.

1759, 1690, 1250, 1223, 1123, 1072, 999, 837, 795, 756, 718  $\text{cm}^{-1}$ ; HRMS (ESI)  $m/z$ :  $[M + Na]^+$   
Calcd for  $\text{C}_{14}\text{H}_{19}\text{Cl}_3\text{O}_4\text{SiNa}$  407.0010; found 407.0015.

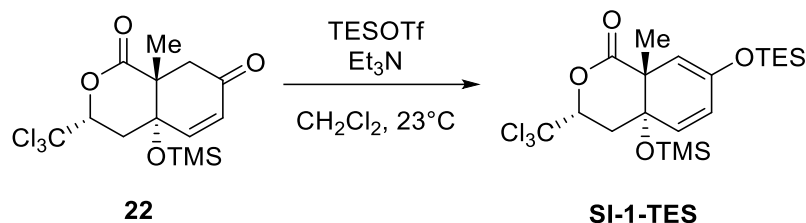

**Triethylsiloxydiene SI-1-TES:** To a stirred solution of **22** (4.2 g, 10.9 mmol) and triethylamine (4.6 mL, 33.0 mmol) in  $\text{CH}_2\text{Cl}_2$  (110 mL) was added TESOTf (5.0 mL, 22.0 mmol) at 0 °C. After being stirred at 23 °C for 9 h, to the resulting mixture was quenched with saturated aqueous  $\text{NaHCO}_3$  (30 mL). The organic layer was separated, and the aqueous layer was extracted with  $\text{CHCl}_3$  (50 mL  $\times$  2). The combined organic layers were dried over  $\text{MgSO}_4$ , filtered, and concentrated under reduced pressure. The residue was purified by silica gel column chromatography (hexane/AcOEt) to afford siloxydiene **SI-1-TES** (5.1 g, 94%) as white solids.  $R_f$  = 0.25 (10% AcOEt/hexane, UV, potassium permanganate); mp 147–149 °C (hexane);  $[\alpha]_D^{23}$  = +219.3 ( $c$  = 1.05, acetone);  $^1\text{H}$  NMR (500 MHz,  $\text{CDCl}_3$ )  $\delta$  5.92 (dd,  $J$  = 9.7, 2.0 Hz, 1H), 5.74 (d,  $J$  = 9.5 Hz, 1H), 5.52 (d,  $J$  = 1.7 Hz, 1H), 5.05 (dd,  $J$  = 8.5, 6.7 Hz, 1H), 2.47–2.29 (m, 2H), 1.27 (s, 3H), 1.00 (t,  $J$  = 7.9 Hz, 9H), 0.80–0.69 (m, 6H), 0.03 (s, 9H);  $^{13}\text{C}$  NMR (125 MHz,  $\text{CDCl}_3$ )  $\delta$  170.9, 146.5, 129.9, 127.1, 108.2, 99.2, 83.0, 72.3, 50.2, 35.8, 18.4, 6.6, 4.8, 1.9; IR (neat)  $\nu_{\text{max}}$ : 2959, 2878, 1744, 1651, 1589, 1458, 1400, 1258, 1173, 1126, 1045, 1003  $\text{cm}^{-1}$ ; HRMS (FAB)  $m/z$ :  $[M + Na]^+$  Calcd for  $\text{C}_{20}\text{H}_{33}\text{Cl}_3\text{O}_4\text{Si}_2\text{Na}$  521.0881; found 521.0883.

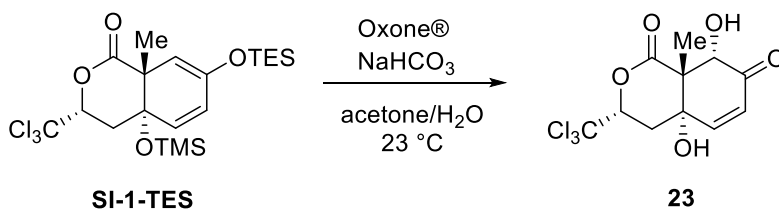

**Diol 23:** To a stirred suspension of **SI-1-TES** (5.0 g, 10 mmol) and  $\text{NaHCO}_3$  (8.4 g, 100 mmol) in acetone/ $\text{H}_2\text{O}$  = 4:1 (80 mL : 20 mL) at  $-15$  °C was added Oxone<sup>®</sup> (15.0 g, 25 mmol). The reaction mixture was stirred at 23 °C for 3 h, and Oxone<sup>®</sup> (15.0 g, 25 mmol) was additionally added to the mixture at  $-15$  °C. The reaction mixture was stirred at 23 °C for 6 h, before it was quenched with water (500 mL) at 0 °C. The aqueous layer was extracted with AcOEt (100 mL  $\times$  3). The combined organic layers were washed brine (50 mL), dried over  $\text{MgSO}_4$ , filtered, and concentrated under reduced pressure. The residue was purified by column chromatography

Hexanes-EtOAc) to afford product **23** (1.8 g, 55%) as white solids.  $R_f$  = 0.30 (40% AcOEt/hexane, potassium permanganate); mp 210 °C decomp (hexane/acetone);  $[\alpha]_D^{23} = -45.5$  ( $c = 1.12$ , acetone);  $^1\text{H}$  NMR (500 MHz, acetone- $d_6$ )  $\delta$  6.96 (d,  $J = 10.3$  Hz, 1H), 6.71 (br s, 1H), 6.02 (d,  $J = 10.2$  Hz, 1H), 5.50 (dd,  $J = 8.6, 6.8$  Hz, 1H), 5.31 (br s, 1H), 4.34 (s, 1H), 2.66 (d,  $J = 14.6, 8.9$  Hz, 1H), 2.41 (dd,  $J = 14.6, 6.6$  Hz, 1H), 1.30 (s, 3H);  $^{13}\text{C}$  NMR (125 MHz, acetone- $d_6$ )  $\delta$  195.8, 169.8, 148.4, 126.5, 100.7, 83.1, 77.1, 71.6, 49.7, 35.3, 17.1; IR (neat)  $\nu_{\text{max}}$ : 3507, 3456, 1747, 1697, 1411, 1219, 1168, 1123, 1022  $\text{cm}^{-1}$ ; HRMS (FAB)  $m/z$ :  $[\text{M} + \text{Na}]^+$  Calcd for  $\text{C}_{11}\text{H}_{11}\text{Cl}_3\text{O}_5\text{Na}$  350.9570; found 350.9573.

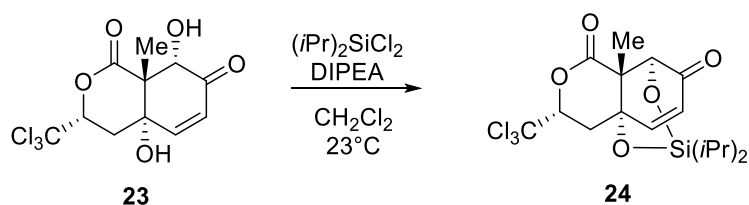

**Silyl protected enone 24:** To a stirred solution of **23** (1.1 g, 3.34 mmol) in  $\text{CH}_2\text{Cl}_2$  (40 mL) was added DIPEA (2.3 mL, 13.4 mmol) and dichlorodiisopropylsilane (0.9 mL, 5.0 mmol) at 0 °C. After being stirred at 23 °C for 2 h, the reaction mixture was quenched with water (10 mL). The organic layer was separated, and the aqueous layer was extracted with  $\text{CH}_2\text{Cl}_2$  (10 mL  $\times$  2). The combined organic layers were dried over  $\text{MgSO}_4$ , filtered, and concentrated under reduced pressure. The residue was purified by silica gel chromatography to afford **24** (1.3 g, 90 %) as white amorphous.  $R_f$  = 0.45 (30% AcOEt/hexane, potassium permanganate);  $[\alpha]_D^{23} = +17.2$  ( $c = 1.16$ , acetone);  $^1\text{H}$  NMR (500 MHz,  $\text{CDCl}_3$ )  $\delta$  6.73 (d,  $J = 10.0$  Hz, 1H), 6.13 (dd,  $J = 10.0, 1.4$  Hz, 1H), 5.07 (dd,  $J = 8.7, 7.3$  Hz, 1H), 4.61 (d,  $J = 1.2$  Hz, 1H), 2.66 (dd,  $J = 14.9, 7.2$  Hz, 1H), 2.45 (dd,  $J = 14.9, 8.9$  Hz, 1H), 1.24 (s, 3H), 1.04–0.85 (m, 14H);  $^{13}\text{C}$  NMR (125 MHz,  $\text{CDCl}_3$ )  $\delta$  193.4, 168.3, 144.7, 127.1, 98.4, 81.9, 76.3, 70.9, 49.0, 35.4, 17.2, 17.0, 16.58, 16.55, 16.50, 14.6, 14.5; IR (neat)  $\nu_{\text{max}}$ : 2947, 1762, 1705, 1462, 1389, 1376, 1219, 1115  $\text{cm}^{-1}$ ; HRMS (FAB)  $m/z$ :  $[\text{M} + \text{H}]^+$  Calcd for  $\text{C}_{17}\text{H}_{24}\text{Cl}_3\text{O}_5\text{Si}$  441.0459; found 441.0452.



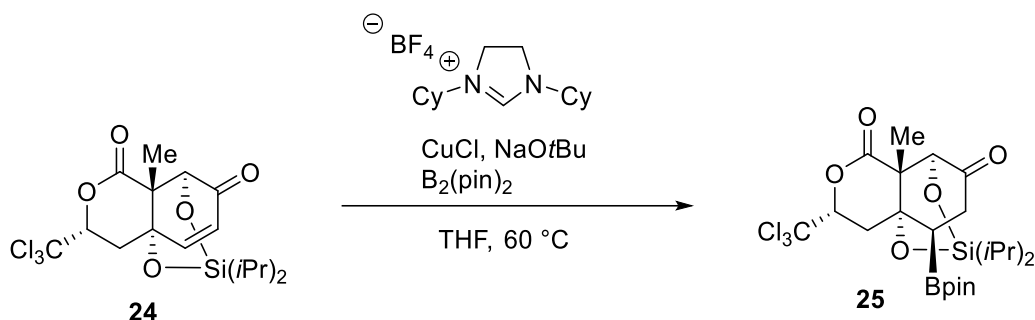

**Borylated compound 25:**<sup>6</sup> To a stirred suspension of CuCl (158 mg, 1.6 mmol) in THF (16 mL, 0.15M) were sequentially added 1,3-dicyclohexylimidazolium tetrafluoroborate (256 mg, 0.8 mmol) and NaOtBu (308 mg, 3.2 mmol) at 23 °C. After being stirred for 40 min, **24** (707 mg, 1.6 mmol) and B<sub>2</sub>Pin<sub>2</sub> (813 mg, 3.2 mmol) was added to the reaction mixture. The reaction mixture was warmed up to 60 °C and stirred for 3 h, before the reaction was quenched with saturated aqueous NH<sub>4</sub>Cl (10 mL) and diluted with Et<sub>2</sub>O (50 mL). The organic layer was separated, and the aqueous layer was extracted with Et<sub>2</sub>O (50 mL). The combined organic layers were washed with brine (10 mL) and dried over MgSO<sub>4</sub>, filtered, and concentrated under reduced pressure. The residue was purified by silica gel chromatography to afford product **25** (640 mg, 70%) as white amorphous. *R*<sub>f</sub> = 0.35 (20% AcOEt/hexane, hanesian); [ $\alpha$ ]<sub>D</sub><sup>23</sup> = −6.9 (*c* = 1.01, acetone); <sup>1</sup>H NMR (500 MHz, CDCl<sub>3</sub>)  $\delta$  4.94 (dd, *J* = 9.2, 8.0 Hz, 1H), 4.43 (s, 1H), 3.40 (dd, *J* = 15.2, 7.7 Hz, 1H), 3.19 (dd, *J* = 15.8, 10.3 Hz, 1H), 2.68 (d, *J* = 15.5 Hz, 1H), 2.51 (dd, *J* = 15.3, 9.3 Hz, 1H), 2.17 (d, *J* = 10.0 Hz, 1H), 1.24 (s, 12H), 1.15 (s, 3H), 1.09–0.93 (m, 14H); <sup>13</sup>C NMR (125 MHz, CDCl<sub>3</sub>)  $\delta$  206.0, 170.0, 98.5, 84.5, 82.7, 79.2, 76.96, 50.4, 36.7, 33.9, 24.7, 24.6, 17.7, 17.5, 17.4, 16.9, 16.8, 16.5, 14.0; IR (neat)  $\nu_{\text{max}}$ : 2947, 2866, 1763, 1728, 1462, 1354, 1327, 1215, 1130 cm<sup>−1</sup>; HRMS (FAB) *m/z*: [*M* + *H*]<sup>+</sup> Calcd for C<sub>23</sub>H<sub>37</sub>BCl<sub>3</sub>O<sub>7</sub>Si 569.1467; found 569.1460.

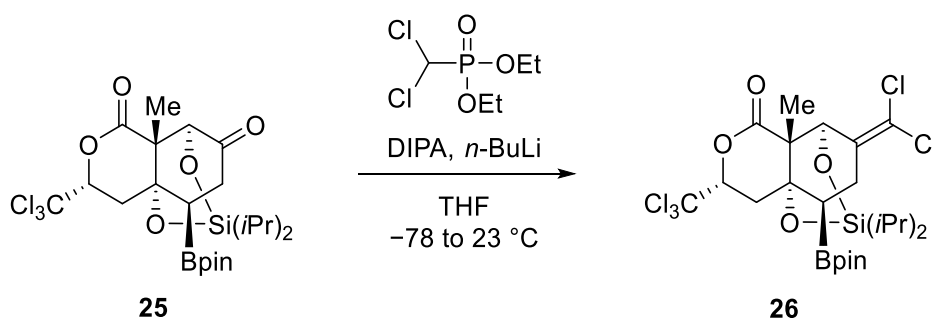

**Dichloroalkene 26:** Preparation of LDA solution: To a solution of diisopropylamine (63  $\mu$ L, 0.45 mmol) in THF (0.75 mL) was added a 1.6 M solution of butyllithium in hexane (0.25 mL, 0.40 mmol) at −78 °C.

<sup>6</sup> Li, H.; Chen, Q.; Lu, Z.; Li, A. *J. Am. Chem. Soc.* **2016**, *138*, 15555–15558.

To a solution of diethyl (dichloromethyl)phosphonate<sup>7</sup> (132 mg, 0.60 mmol) and **25** (113 mg, 0.20 mmol) in THF (1.0 mL) was slowly added a solution of LDA via a cannula at  $-78\text{ }^{\circ}\text{C}$ . The resulting mixture was stirred at  $-78\text{ }^{\circ}\text{C}$  for 2 h. The mixture was warmed up to  $23\text{ }^{\circ}\text{C}$  and quenched with saturated aqueous  $\text{NH}_4\text{Cl}$  (2 mL) and diluted with AcOEt (10 mL). The organic layer was separated, and the aqueous layer was extracted with AcOEt (10 mL). The combined organic layers were washed with brine (2 mL), dried with  $\text{MgSO}_4$ , filtered, and concentrated under reduced pressure. The residue was purified by column chromatography on silica gel (hexane/AcOEt) to afford product **26** (50.0 mg, 40%) as colorless amorphous.  $R_f = 0.52$  (15% AcOEt/hexane, *hanessian*);  $[\alpha]_{\text{D}}^{23} = +29.3$  ( $c = 1.2$ , acetone);  $^1\text{H}$  NMR (500 MHz,  $\text{CDCl}_3$ )  $\delta$  5.42 (s, 1H), 4.96 (dd,  $J = 8.5, 8.5$  Hz, 1H), 3.29 (dd,  $J = 15.0, 8.2$  Hz, 1H), 3.16 (d,  $J = 15.2$  Hz, 1H), 2.67 (dd,  $J = 15.3, 7.9$  Hz, 1H), 2.38 (dd,  $J = 15.2, 8.9$  Hz, 1H), 1.83 (d,  $J = 7.5$  Hz, 1H), 1.25 (s, 12H), 1.17 (s, 3H), 1.08–0.91 (m, 14H);  $^{13}\text{C}$  NMR (125 MHz,  $\text{CDCl}_3$ )  $\delta$  170.1, 133.5, 118.9, 98.7, 84.2, 82.6, 76.7, 73.8, 49.9, 36.4, 24.74, 24.69, 24.6, 17.9, 17.8, 17.6, 17.0, 16.8, 16.6, 13.8; IR (neat)  $\nu_{\text{max}}$ : 2943, 2886, 1763, 1620, 1462, 1358, 1327, 1242, 1215, 1135, 1053, 995  $\text{cm}^{-1}$ ; HRMS (ESI)  $m/z$ :  $[\text{M} + \text{Na}]^+$  Calcd for  $\text{C}_{24}\text{H}_{36}\text{BCl}_5\text{O}_6\text{SiNa}$  657.0709; found 657.0703.

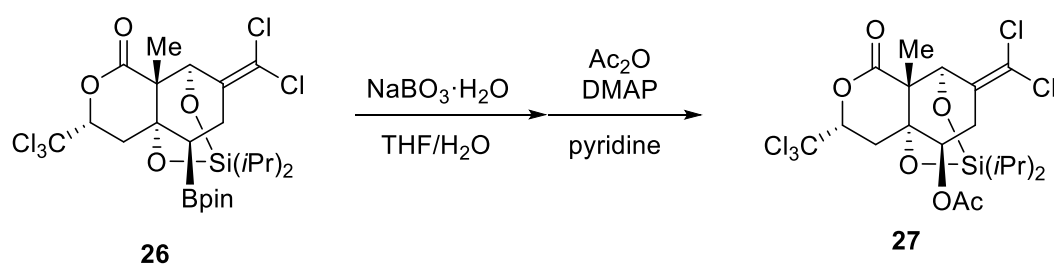

**Acetate 27:** To a stirred solution of **26** (95.0 mg, 0.15 mmol) in (2.0 mL, THF/H<sub>2</sub>O = 1:1) was added NaBO<sub>3</sub>·4H<sub>2</sub>O (230 mg, 1.5 mmol) at 23 °C. After being stirred at 23 °C for 1 h, the reaction mixture was diluted with water (5 mL) and extracted with EtOAc (5 mL × 3). The combined organic layers were dried over MgSO<sub>4</sub>, filtered, and concentrated under reduced pressure to afford the crude alcohol. The crude was dissolved in pyridine (1.5 mL) and DMAP (1.9 mg, 15 μmol) and acetic anhydride (43.0 μL, 0.45 mmol) was added to the mixture at 23 °C. After being stirred at 23 °C for 2 h, the mixture was quenched with water (10 mL) and diluted with AcOEt (10 mL). The organic layer was separated, and the aqueous layer was extracted with AcOEt (5 mL × 3). The combined organic layers were washed with H<sub>2</sub>O (5 mL × 3), brine (10 mL) and dried over MgSO<sub>4</sub>, filtered, and concentrated under reduced pressure. The residue was purified by silica gel column chromatography to afford product **27** (66.1 mg, 78%) as white solids. R<sub>f</sub> = 0.25 (15%

<sup>7</sup> Marinetti, A.; Savignac, P. *Org. Synth.*, **1997**, 74, 108.

AcOEt/hexane, hanesian); mp 230–232 °C (hexane/AcOEt);  $[\alpha]_D^{23} = -7.2$  ( $c = 1.3$ , acetone);  $^1\text{H}$  NMR (500 MHz,  $\text{CDCl}_3$ )  $\delta$  5.52 (s, 1H), 5.00 (t,  $J = 8.6$  Hz, 1H), 4.99 (dd,  $J = 4.3$ , 1.7 Hz, 1H), 3.10 (d,  $J = 16.6$  Hz, 1H), 2.95 (dd,  $J = 16.9$ , 4.3 Hz, 1H), 2.57 (dd,  $J = 14.9$ , 8.6 Hz, 1H), 2.29 (dd,  $J = 15.0$ , 8.2 Hz, 1H), 2.13 (s, 3H), 1.34 (s, 3H), 1.18–0.90 (m, 14H);  $^{13}\text{C}$  NMR (125 MHz,  $\text{CDCl}_3$ )  $\delta$  170.0, 169.2, 130.7, 120.6, 98.4, 82.3, 75.3, 73.6, 73.1, 49.3, 33.0, 28.4, 21.2, 17.59, 17.56, 17.1, 16.74, 16.71, 16.4, 14.2; IR (neat)  $\nu_{\text{max}}$ : 2947, 2866, 1759, 1735, 1620, 1458, 1431, 1369, 1307, 1222, 1149  $\text{cm}^{-1}$ ; HRMS (ESI)  $m/z$ :  $[\text{M} + \text{H}]^+$  Calcd for  $\text{C}_{20}\text{H}_{28}\text{Cl}_5\text{O}_6\text{Si}$  567.0092; found 567.0092.

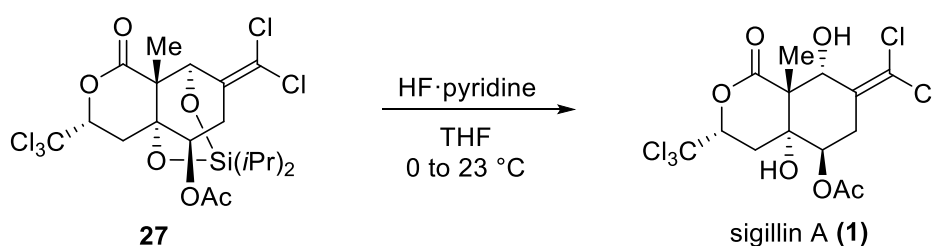

**Sigillin A:** To a stirred solution of **27** (68.0 mg, 0.12 mmol) in THF (2.0 mL) was added HF·pyridine (14.8  $\mu$ L, 0.48 mmol) at 0  $^{\circ}$ C. After being stirred at 23  $^{\circ}$ C for 30 min, the reaction mixture was quenched with water (5 mL) and diluted with AcOEt (10 mL). The organic layer was separated, and the aqueous layer was extracted with AcOEt (5 mL). The combined organic layers were washed with brine (10 mL) and dried over MgSO<sub>4</sub>, filtered, and concentrated under reduced pressure. The residue was purified by silica gel column chromatography (hexane/AcOEt) to afford (–)-sigillin A (**1**) (46.1 mg, 84%) as white solids.  $R_f$  = 0.21 (20% AcOEt/hexane, hanesian); mp 245–249  $^{\circ}$ C (hexane/Et<sub>2</sub>O);  $[\alpha]_D^{23}$  = –42.9 ( $c$  = 0.91, acetone); <sup>1</sup>H NMR (500 MHz, CDCl<sub>3</sub>)  $\delta$  5.32 (d,  $J$  = 3.7 Hz, 1H), 5.21 (d,  $J$  = 2.3 Hz, 1H), 5.09 (dd,  $J$  = 8.6, 7.5 Hz, 1H), 5.00 (dd,  $J$  = 3.0, 3.0 Hz, 1H), 3.80 (d,  $J$  = 3.7 Hz, 1H), 3.15 (ddd,  $J$  = 15.8, 2.7, 1.0 Hz, 1H), 2.92 (dd,  $J$  = 16.0, 3.2 Hz, 1H), 2.50 (ddd,  $J$  = 14.8, 8.7, 2.6 Hz, 1H), 2.18 (dd,  $J$  = 14.5, 7.3 Hz, 1H), 2.12 (s, 3H), 1.34 (s, 1H); <sup>13</sup>C NMR (125 MHz, CDCl<sub>3</sub>)  $\delta$  171.7, 169.2, 129.3, 121.8, 98.3, 82.7, 74.1, 73.4, 73.0, 50.0, 31.8, 26.9, 21.1, 15.3; IR (neat)  $\nu_{max}$ : 3368, 3020, 2958, 1743, 1628, 1420, 1373, 1350, 1226, 1145, 1095, 1026  $cm^{-1}$ ; HRMS (FAB)  $m/z$ :  $[M + H]^+$  Calcd for C<sub>14</sub>H<sub>16</sub>Cl<sub>5</sub>O<sub>6</sub> 454.9390; found 454.9395.

### 3. Comparison of NMR Spectroscopic Data Natural and Synthetic Sigillin A

**Table S1.** Comparison of the isolated and our  $^1\text{H}$  NMR data for sigillin A.

| Natural sigillin A $^1\text{H}$ NMR Data:<br>600 MHz, $\text{CDCl}_3$ | Our $^1\text{H}$ NMR Data:<br>500 MHz, $\text{CDCl}_3$ |
|-----------------------------------------------------------------------|--------------------------------------------------------|
| 5.32 (dd, 1H, $J = 3.8, 1.0$ Hz)                                      | 5.32 (d, 1H, $J = 3.7$ Hz)                             |
| 5.24 (dd, 1H, $J = 2.4, 0.9$ Hz)                                      | 5.21 (d, 1H, $J = 2.3$ Hz)                             |
| 5.09 (dd, 1H, $J = 8.8, 7.3$ Hz)                                      | 5.09 (dd, 1H, $J = 8.6, 7.5$ Hz)                       |
| 5.00 <sup>8</sup> (dd, 1H, $J = 3.2, 2.7$ Hz)                         | 5.00 (dd, 1H, $J = 3.0, 3.0$ Hz)                       |
| 3.90 (d, 1H, $J = 3.8$ Hz)                                            | 3.80 (d, 1H, $J = 3.7$ Hz)                             |
| 3.16 (ddd, 1H, $J = 15.8, 2.7, 1.0$ Hz)                               | 3.15 (ddd, 1H, $J = 15.8, 2.7, 1.0$ Hz)                |
| 2.93 (dd, 1H, $J = 15.8, 3.2$ Hz)                                     | 2.92 (dd, 1H, $J = 16.0, 3.2$ Hz)                      |
| 2.50 (ddd, 1H, $J = 14.7, 8.8, 2.4$ Hz)                               | 2.50 (ddd, 1H, $J = 14.8, 8.7, 2.6$ Hz)                |
| 2.18 (ddd, 1H, $J = 14.7, 7.3, 0.9$ Hz)                               | 2.18 (dd, 1H, $J = 14.5, 7.3$ Hz)                      |
| 2.12 (s, 3H)                                                          | 2.12 (s, 3H)                                           |
| 1.34 (s, 3H)                                                          | 1.34 (s, 3H)                                           |

**Table S2.** Comparison of the isolated and our  $^{13}\text{C}$  NMR data for sigillin A.

| Isolated sigillin A $^{13}\text{C}$ NMR Data:<br>151 MHz, $\text{CDCl}_3$ | Our $^{13}\text{C}$ NMR Data:<br>125 MHz, $\text{CDCl}_3$ |
|---------------------------------------------------------------------------|-----------------------------------------------------------|
| 171.8                                                                     | 171.7                                                     |
| 169.2                                                                     | 169.2                                                     |
| 129.3                                                                     | 129.3                                                     |
| 121.9                                                                     | 121.8                                                     |
| 98.3                                                                      | 98.3                                                      |
| 82.7                                                                      | 82.7                                                      |
| 74.1                                                                      | 74.1                                                      |
| 73.4                                                                      | 73.4                                                      |
| 73.0                                                                      | 73.0                                                      |
| 50.0                                                                      | 50.0                                                      |
| 31.8                                                                      | 31.8                                                      |
| 27.0                                                                      | 26.9                                                      |
| 21.1                                                                      | 21.1                                                      |
| 15.3                                                                      | 15.3                                                      |

<sup>8</sup> This chemical shift is assumed to be a typographic error. Their data for the isolated material indicated a chemical shift of 5.00 ppm.

#### 4. Optimization Conditions of Allylation

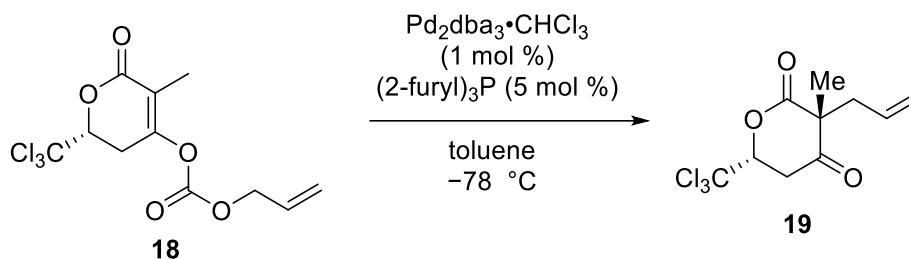

1.0 mmol scale optimization of reaction conditions: A solution of  $\text{Pd}_2\text{dba}_3 \cdot \text{CHCl}_3$  and ligand in toluene was stirred for 10 min at  $23\text{ }^\circ\text{C}$ . Then, a solution of **18** in toluene was slowly added to the mixture at  $-78\text{ }^\circ\text{C}$ . After the mixture was gradually warmed up to  $23\text{ }^\circ\text{C}$ , the solvent was evaporated. The residue was purified by column chromatography on silica gel (hexane/AcOEt) to afford product **19**.

| entry | Pd (x mol %)                    | Ligand (x mol %)                    | solvent | temp  | Yield (%) | dr    |
|-------|---------------------------------|-------------------------------------|---------|-------|-----------|-------|
| 1     | $\text{Pd}(\text{PPh}_3)_4$ (3) | none                                | THF     | $-78$ | 87        | 73:27 |
| 2     | $\text{Pd}(\text{PPh}_3)_4$ (3) | none                                | toluene | $-78$ | 93        | 83:17 |
| 3     | $\text{Pd}_2\text{dba}_3$ (3)   | $\text{PPh}_3$ (15)                 | toluene | $-78$ | 90        | 85:15 |
| 4     | $\text{Pd}_2\text{dba}_3$ (3)   | $(2\text{-furyl})_3\text{P}$ (15)   | toluene | $-78$ | 97        | 94:6  |
| 5     | $\text{Pd}_2\text{dba}_3$ (3)   | $(2\text{-thienyl})_3\text{P}$ (15) | toluene | $-78$ | 99        | 87:13 |
| 6     | $\text{Pd}_2\text{dba}_3$ (3)   | $(c\text{-hex})_3\text{P}$ (15)     | toluene | $-78$ | 10        | 81:19 |
| 7     | $\text{Pd}_2\text{dba}_3$ (3)   | dppe (7.5)                          | toluene | $-78$ | 90        | 81:19 |
| 8     | $\text{Pd}_2\text{dba}_3$ (3)   | dppf (7.5)                          | toluene | $-78$ | 95        | 89:11 |
| 9     | $\text{Pd}_2\text{dba}_3$ (3)   | none                                | toluene | $-78$ | 10        | 63:37 |
| 10    | $\text{Pd}_2\text{dba}_3$ (2)   | $(2\text{-furyl})_3\text{P}$ (10)   | toluene | $-78$ | 96        | 93:7  |
| 11    | $\text{Pd}_2\text{dba}_3$ (1)   | $(2\text{-furyl})_3\text{P}$ (5)    | toluene | $-78$ | 96        | 94:6  |

## 5. Optimization Conditions of Rubottom Oxidation

### Preparation of Siloxydienes:

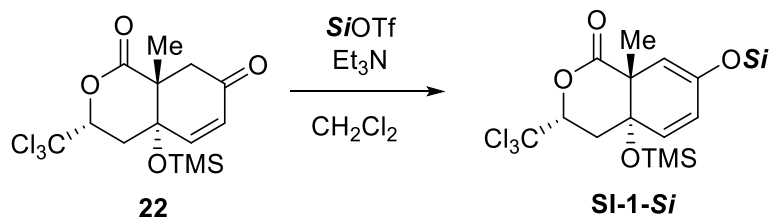

(siloxydiene **SI-1-TMS**, **TBS**, **TES**); To a solution of **22** (386 mg, 1.0 mmol) and triethylamine (1.1 mL, 8.0 mmol) in  $\text{CH}_2\text{Cl}_2$  (10 mL) was added  $\text{SiOTf}$  (4.0 mmol) at 0 °C. After being stirred at 23 °C for 9 h, to the resulting mixture was quenched with saturated aqueous  $\text{NaHCO}_3$  (10 mL). The organic layer was separated, and the aqueous layer was extracted with  $\text{CHCl}_3$  (10 mL). The combined organic layers were dried over  $\text{MgSO}_4$ , filtered, and concentrated under reduced pressure. The residue was purified by silica gel column chromatography (hexane/ $\text{AcOEt}$ ) to afford the corresponding siloxydiene **SI-1-Si** as white solids.

(**SI-1-TMS**) (264 mg, 58% yield)  $R_f$  = 0.28 (10%  $\text{AcOEt}$ /hexane, UV, potassium permanganate); mp 208–210 °C (hexane/ $\text{AcOEt}$ );  $[\alpha]_D^{23}$  = +230.3 ( $c$  = 1.00, acetone);  $^1\text{H}$  NMR (500 MHz,  $\text{CDCl}_3$ )  $\delta$  5.91 (dd,  $J$  = 9.6, 2.2 Hz, 1H), 5.74 (d,  $J$  = 9.5 Hz, 1H), 5.52 (d,  $J$  = 2.0 Hz, 1H), 5.05 (dd,  $J$  = 8.5, 7.0 Hz, 1H), 2.49–2.31 (m, 2H), 1.28 (s, 3H), 0.26 (s, 9H), 0.03 (s, 9H);  $^{13}\text{C}$  NMR (125 MHz,  $\text{CDCl}_3$ )  $\delta$  170.9, 146.3, 129.9, 127.2, 108.7, 99.1, 83.1, 72.2, 50.3, 35.9, 18.5, 1.9, 0.2; IR (neat)  $\nu_{\text{max}}$ : 2959, 2901, 1743, 1651, 1589, 1400, 1253, 1173, 1126, 1042  $\text{cm}^{-1}$ ; HRMS (FAB)  $m/z$ :  $[\text{M} + \text{Na}]^+$  Calcd for  $\text{C}_{17}\text{H}_{27}\text{Cl}_3\text{O}_4\text{Si}_2\text{Na}$  479.0411; found 479.0413.

(**SI-1-TBS**) (328 mg, 66% yield)  $R_f$  = 0.25 (10%  $\text{AcOEt}$ /hexane, UV, potassium permanganate); mp 214–217 °C (hexane/ $\text{AcOEt}$ );  $[\alpha]_D^{23}$  = +179.3 ( $c$  = 0.93, acetone);  $^1\text{H}$  NMR (500 MHz,  $\text{CDCl}_3$ )  $\delta$  5.90 (dd,  $J$  = 9.6, 1.9 Hz, 1H), 5.74 (d,  $J$  = 9.5 Hz, 1H), 5.49 (s, 1H), 5.05 (dd,  $J$  = 8.3, 7.2 Hz, 1H), 2.46–2.34 (m, 2H), 1.27 (s, 3H), 0.93 (s, 9H), 0.22 (s, 3H), 0.20 (s, 3H), 0.03 (s, 9H);  $^{13}\text{C}$  NMR (125 MHz,  $\text{CDCl}_3$ )  $\delta$  171.0, 146.5, 130.0, 127.1, 108.7, 99.2, 83.1, 72.3, 50.3, 35.9, 25.5, 18.4, 17.9, 1.9, –4.56, –4.73; IR (neat)  $\nu_{\text{max}}$ : 2955, 2931, 2858, 1744, 1651, 1589, 1462, 1400, 1253, 1123, 1046  $\text{cm}^{-1}$ ; HRMS (FAB)  $m/z$ :  $[\text{M} + \text{Na}]^+$  Calcd for  $\text{C}_{20}\text{H}_{33}\text{Cl}_3\text{O}_4\text{Si}_2\text{Na}$  521.0881; found 521.0876.

(**SI-1-TES**) (436 mg, 87% yield)  $R_f$  = 0.25 (10%  $\text{AcOEt}$ /hexane, UV, potassium permanganate); mp 147–149 °C (hexane);  $[\alpha]_D^{23}$  = +219.3 ( $c$  = 1.05, acetone);  $^1\text{H}$  NMR (500 MHz,  $\text{CDCl}_3$ )  $\delta$  5.92 (dd,  $J$  = 9.7, 2.0 Hz, 1H), 5.74 (d,  $J$  = 9.5 Hz, 1H), 5.52 (d,  $J$  = 1.7 Hz, 1H), 5.05 (dd,  $J$  = 8.5,

6.7 Hz, 1H), 2.47–2.29 (m, 2H), 1.27 (s, 3H), 1.00 (t,  $J = 7.9$  Hz, 9H), 0.80–0.69 (m, 6H), 0.03 (s, 9H);  $^{13}\text{C}$  NMR (125 MHz,  $\text{CDCl}_3$ )  $\delta$  170.9, 146.5, 129.9, 127.1, 108.2, 99.2, 83.0, 72.3, 50.2, 35.8, 18.4, 6.6, 4.8, 1.9; IR (neat)  $\nu_{\text{max}}$ : 2959, 2878, 1744, 1651, 1589, 1458, 1400, 1258, 1173, 1126, 1045, 1003  $\text{cm}^{-1}$ ; HRMS (FAB)  $m/z$ :  $[\text{M} + \text{Na}]^+$  Calcd for  $\text{C}_{20}\text{H}_{33}\text{Cl}_3\text{O}_4\text{Si}_2\text{Na}$  521.0881; found 521.0883.

### Optimization Conditions of Rubottom Oxidation of SI-1-Si with DMDO:

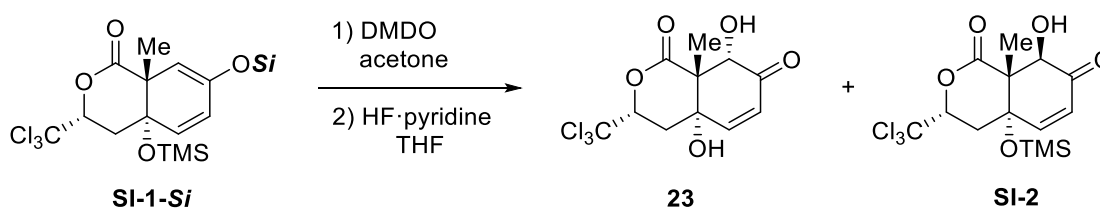

**General procedure:** To a solution of the siloxydiene (0.3 mmol) in acetone (1 mL) was added a 0.06 M acetone solution DMDO (10 mL, 0.6 mmol) at  $-78$  °C. After being stirred at  $0$  °C for 24 h, removal of volatile in vacuo to afford the crude. The crude was dissolved in THF (3 mL) and HF·pyridine (37  $\mu\text{L}$ , 1.2 mmol) was added at  $0$  °C. After being stirred at  $23$  °C for 1 h, the reaction mixture was quenched with water (5 mL) and diluted with AcOEt (10 mL). The organic layer was separated, and the aqueous layer was extracted with AcOEt (5 mL). The combined organic layers were washed with brine (2 mL) and dried over  $\text{MgSO}_4$ , filtered, and concentrated under reduced pressure. The residue was purified by silica gel column chromatography (hexane/AcOEt) to afford the desired diol **23** and **29**.

| entry | reagents      | Si  | solvent                  | Temp (°C) | yield (%) | <b>23:SI-2</b> |
|-------|---------------|-----|--------------------------|-----------|-----------|----------------|
| 1     | <i>m</i> CPBA | TMS | $\text{CH}_2\text{Cl}_2$ | 23        | 14        | 67:23          |
| 2     | DMDO          | TMS | acetone                  | 0         | 69        | 58:42          |
| 3     | DMDO          | TES | acetone                  | 0         | 48        | 95:5           |
| 4     | DMDO          | TBS | acetone                  | 0         | 15        | 95:5           |

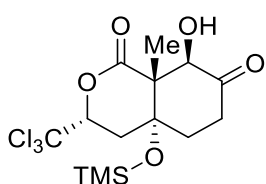

(**SI-2**): as amorphous.  $R_f = 0.28$  (40% AcOEt/hexane, potassium permanganate);  $^1\text{H}$  NMR (500 MHz,  $\text{CDCl}_3$ )  $\delta$  6.73 (d,  $J = 10.0$  Hz, 1H), 6.23 (d,  $J = 10.0$  Hz, 1H), 5.18 (dd,  $J = 8.6, 6.9$  Hz, 1H), 5.08 (s, 1H), 3.78 (d,  $J = 2.6$  Hz, 1H), 2.56 (dd,  $J = 14.6, 6.9$  Hz, 1H), 2.49 (dd,  $J = 14.9, 8.6$  Hz, 1H), 1.30 (s, 3H), 0.15 (s, 9H);  $^{13}\text{C}$  NMR (125 MHz)  $\delta$  195.8, 170.6, 143.1, 129.4, 98.5, 82.2, 74.2, 73.8, 54.9, 35.9, 11.1, 1.9; IR (neat)  $\nu_{\text{max}}$ : 3541, 2959, 1751, 1694, 1396, 1254, 1119  $\text{cm}^{-1}$ ; HRMS (FAB)  $m/z$ :  $[\text{M} + \text{H}]^+$  Calcd for  $\text{C}_{14}\text{H}_{20}\text{Cl}_3\text{O}_5\text{Si}$  401.0146; found 401.0144.

## 6. X-ray Crystallographic Data

**Data collection and Structure solution details:** Single crystal X-ray data for compound **20**, **23** and **1** were collected on a Rigaku XtaLaB P200 diffractometer Cu-K $\alpha$  radiation. Data collection, cell refinement, data reduction and analysis were carried out with the CrysAlisPro (Rigaku Oxford Diffraction). These structures were solved by intrinsic phasing methods with the SHELXT program and refined using SHELXL<sup>9</sup> with anisotropic displacement parameters for non-H atoms. CCDC 2015184, 2015183 and 2015179 contains the supplementary crystallographic data for this paper. These data can be obtained free of charge from the Cambridge Crystallographic Data Centre via [http://www.ccdc.cam.ac.uk/data\\_request/cif](http://www.ccdc.cam.ac.uk/data_request/cif)

X-ray crystallographic data for compound **20** (CCDC 2015184).

Single crystals of **20** were obtained by slow evaporation of a solution containing **20** in the mixture of hexane and ethyl acetate at room temperature. A suitable crystal was selected and the crystal data and structure refinement results for compound **20** are listed in the Table S1.

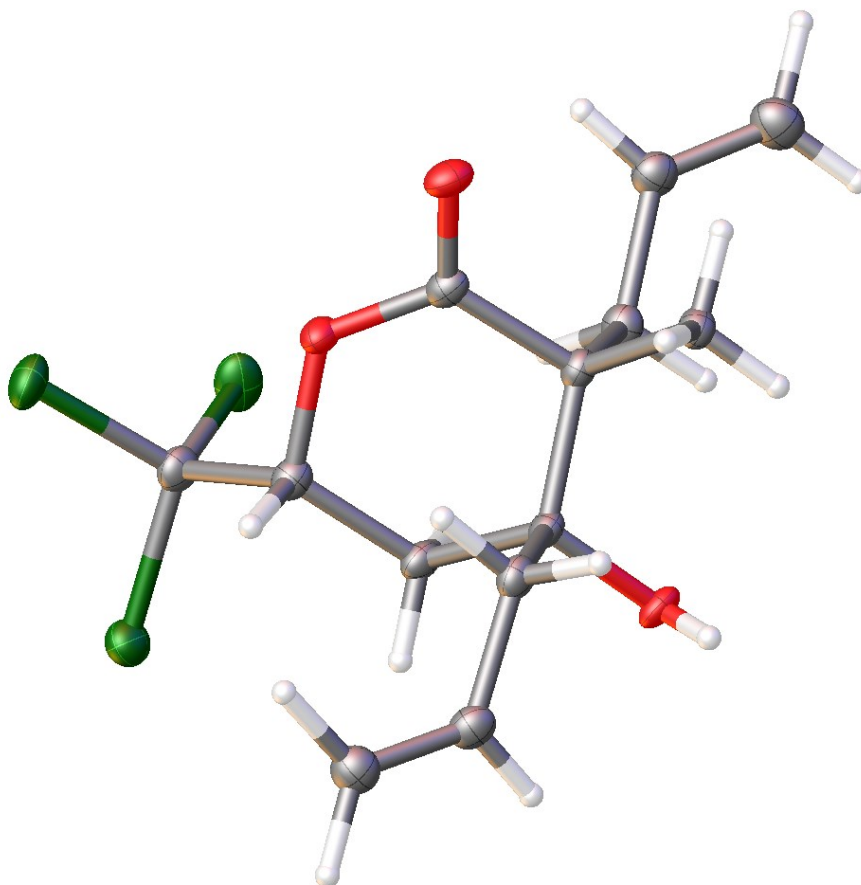

<sup>9</sup> Sheldrick, G. M. A. Short History of SHELX. *Acta Crystallogr., Sect. A: Found. Crystallogr.* **2008**, *64*, 112– 122.



**Figure S1.** ORTEP view of the compound **20** with thermal ellipsoids drawn at the 80% probability level

**Table S3.** Crystal data and structure refinement for **20**.

|                                             |                                                                |
|---------------------------------------------|----------------------------------------------------------------|
| Identification code                         | 20171202tn                                                     |
| Empirical formula                           | C <sub>13</sub> H <sub>13</sub> Cl <sub>3</sub> O <sub>3</sub> |
| Formula weight                              | 323.604                                                        |
| Temperature/K                               | 293                                                            |
| Crystal system                              | orthorhombic                                                   |
| Space group                                 | P2 <sub>1</sub> 2 <sub>1</sub> 2 <sub>1</sub>                  |
| a/Å                                         | 5.9465(3)                                                      |
| b/Å                                         | 12.4317(5)                                                     |
| c/Å                                         | 20.1035(9)                                                     |
| $\alpha$ /°                                 | 90                                                             |
| $\beta$ /°                                  | 90                                                             |
| $\gamma$ /°                                 | 90                                                             |
| Volume/Å <sup>3</sup>                       | 1486.15(12)                                                    |
| Z                                           | 4                                                              |
| $\rho_{\text{calc}}$ /cm <sup>3</sup>       | 1.446                                                          |
| $\mu$ /mm <sup>-1</sup>                     | 5.601                                                          |
| F(000)                                      | 670.2                                                          |
| Crystal size/mm <sup>3</sup>                | 0.1 × 0.1 × 0.1                                                |
| Radiation                                   | Cu K $\alpha$ ( $\lambda$ = 1.54184)                           |
| 2 $\Theta$ range for data collection/°      | 8.36 to 146.76                                                 |
| Index ranges                                | -6 ≤ h ≤ 6, -14 ≤ k ≤ 15, -14 ≤ l ≤ 24                         |
| Reflections collected                       | 5395                                                           |
| Independent reflections                     | 2685 [R <sub>int</sub> = 0.0418, R <sub>sigma</sub> = 0.0447]  |
| Data/restraints/parameters                  | 2685/0/190                                                     |
| Goodness-of-fit on F <sup>2</sup>           | 1.010                                                          |
| Final R indexes [I ≥ 2 $\sigma$ (I)]        | R <sub>1</sub> = 0.0451, wR <sub>2</sub> = 0.1244              |
| Final R indexes [all data]                  | R <sub>1</sub> = 0.0470, wR <sub>2</sub> = 0.1260              |
| Largest diff. peak/hole / e Å <sup>-3</sup> | 0.27/-0.48                                                     |
| Flack parameter                             | -0.06(2)                                                       |

X-ray crystallographic data for compound **23** (CCDC 2015183).

Single crystals of **23** were obtained by slow evaporation of a solution containing **23** in the mixture of hexane and ethyl acetate at room temperature. A suitable crystal was selected and the crystal data and structure refinement results for compound **23** are listed in the Table S2.

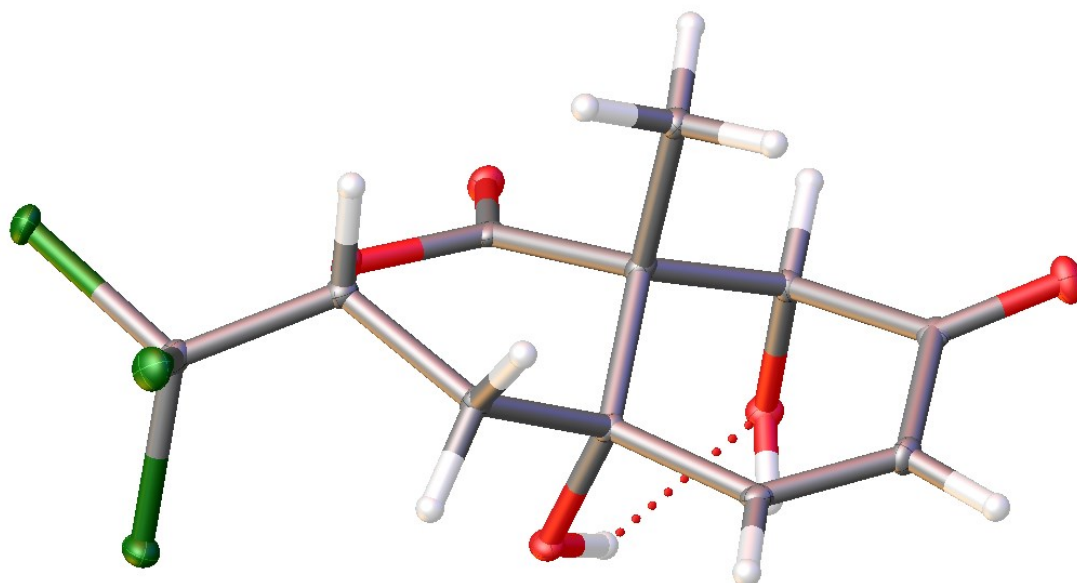

**Figure S2.** ORTEP view of the compound **23** with thermal ellipsoids drawn at the 80% probability level

**Table S2.** Crystal data and structure refinement for **23**.

|                     |                                                                |
|---------------------|----------------------------------------------------------------|
| Identification code | 23                                                             |
| Empirical formula   | C <sub>11</sub> H <sub>11</sub> Cl <sub>3</sub> O <sub>5</sub> |
| Formula weight      | 329.55                                                         |
| Temperature/K       | 93                                                             |
| Crystal system      | monoclinic                                                     |
| Space group         | P2 <sub>1</sub>                                                |
| a/Å                 | 10.9134(2)                                                     |
| b/Å                 | 6.02950(10)                                                    |
| c/Å                 | 10.9547(3)                                                     |
| $\alpha$ / °        | 90                                                             |

|                                               |                                                                  |
|-----------------------------------------------|------------------------------------------------------------------|
| $\beta / ^\circ$                              | 117.801(3)                                                       |
| $\gamma / ^\circ$                             | 90                                                               |
| Volume/ $\text{\AA}^3$                        | 637.64(3)                                                        |
| Z                                             | 2                                                                |
| $\rho_{\text{calc}}/\text{g/cm}^3$            | 1.716                                                            |
| $\mu / \text{mm}^{-1}$                        | 6.661                                                            |
| F(000)                                        | 336.0                                                            |
| Crystal size/ $\text{mm}^3$                   | $0.8 \times 0.2 \times 0.2$                                      |
| Radiation                                     | CuK $\alpha$ ( $\lambda = 1.54184$ )                             |
| $2\Theta$ range for data collection/ $^\circ$ | 9.126 to 146.944                                                 |
| Index ranges                                  | $-13 \leq h \leq 7, -7 \leq k \leq 7, -9 \leq l \leq 13$         |
| Reflections collected                         | 2907                                                             |
| Independent reflections                       | 1819 [ $R_{\text{int}} = 0.0303$ , $R_{\text{sigma}} = 0.0285$ ] |
| Data/restraints/parameters                    | 1819/1/175                                                       |
| Goodness-of-fit on $F^2$                      | 1.052                                                            |
| Final R indexes [ $I \geq 2\sigma(I)$ ]       | $R_1 = 0.0388$ , $wR_2 = 0.1023$                                 |
| Final R indexes [all data]                    | $R_1 = 0.0390$ , $wR_2 = 0.1026$                                 |
| Largest diff. peak/hole / $e \text{\AA}^{-3}$ | 0.72/-0.44                                                       |
| Flack parameter                               | 0.04(2)                                                          |

X-ray crystallographic data for compound **1** (CCDC 2015179).

Single crystals of **1** were obtained by slow evaporation of a solution containing **1** in the mixture of hexane and ethyl acetate at room temperature. A suitable crystal was selected and the crystal data and structure refinement results for compound **1** are listed in the Table S3.

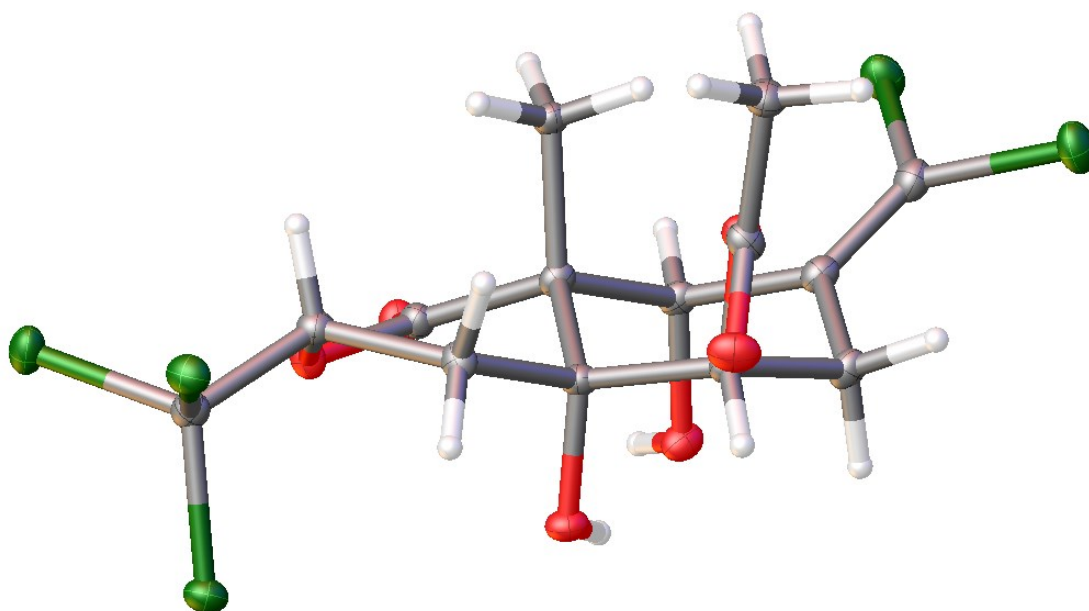

**Figure S3.** ORTEP view of **1** with thermal ellipsoids drawn at the 80% probability level.

**Table S3.** Crystal data and structure refinement for **1**.

|                               |                                                                |
|-------------------------------|----------------------------------------------------------------|
| Empirical formula             | C <sub>14</sub> H <sub>15</sub> Cl <sub>5</sub> O <sub>6</sub> |
| Formula weight                | 456.51                                                         |
| Temperature/K                 | 293                                                            |
| Crystal system                | orthorhombic                                                   |
| Space group                   | P2 <sub>1</sub> 2 <sub>1</sub> 2 <sub>1</sub>                  |
| a/Å                           | 7.27672(10)                                                    |
| b/Å                           | 13.3587(2)                                                     |
| c/Å                           | 18.5617(3)                                                     |
| $\alpha$ /°                   | 90                                                             |
| $\beta$ /°                    | 90                                                             |
| $\gamma$ /°                   | 90                                                             |
| Volume/Å <sup>3</sup>         | 1804.33(5)                                                     |
| Z                             | 4                                                              |
| $\rho$ /calcd/cm <sup>3</sup> | 1.681                                                          |
| $\mu$ /mm <sup>-1</sup>       | 7.602                                                          |
| F(000)                        | 928.0                                                          |
| Crystal size/mm <sup>3</sup>  | 0.2 × 0.2 × 0.03                                               |

|                                               |                                                                  |
|-----------------------------------------------|------------------------------------------------------------------|
| Radiation                                     | Cu K $\alpha$ ( $\lambda$ = 1.54184)                             |
| 2 $\Theta$ range for data collection/°        | 8.154 to 146.776                                                 |
| Index ranges                                  | $-8 \leq h \leq 9$ , $-16 \leq k \leq 15$ , $-23 \leq l \leq 23$ |
| Reflections collected                         | 17428                                                            |
| Independent reflections                       | 3578 [ $R_{\text{int}} = 0.0420$ , $R_{\text{sigma}} = 0.0206$ ] |
| Data/restraints/parameters                    | 3578/0/231                                                       |
| Goodness-of-fit on $F^2$                      | 1.158                                                            |
| Final R indexes [ $I \geq 2 \sigma(I)$ ]      | $R_1 = 0.0338$ , $wR_2 = 0.0951$                                 |
| Final R indexes [all data]                    | $R_1 = 0.0340$ , $wR_2 = 0.0951$                                 |
| Largest diff. peak/hole / e $\text{\AA}^{-3}$ | 0.39/-0.40                                                       |
| Flack parameter                               | 0.001(10)                                                        |

<sup>1</sup>H NMR, CDCl<sub>3</sub>, 500MHz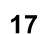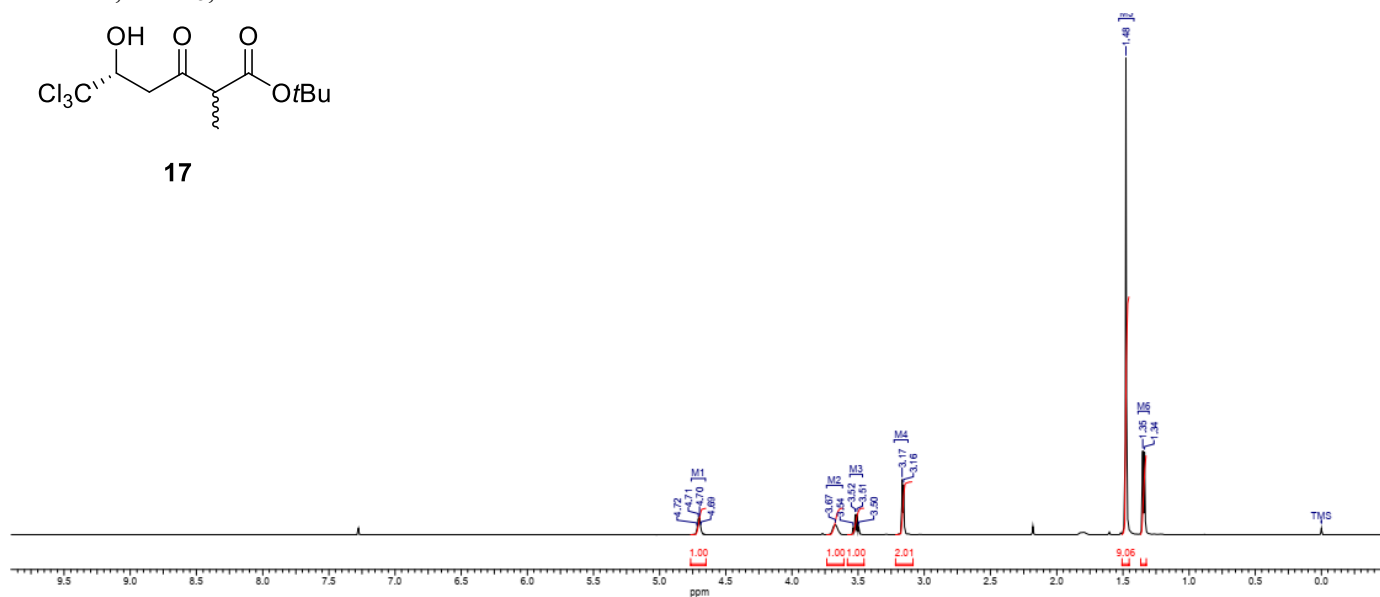[illegible]CCOC(=O)[C@H](\*)C(=O)CC(O)C(Cl)(Cl)Cl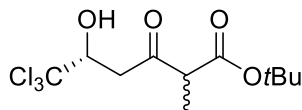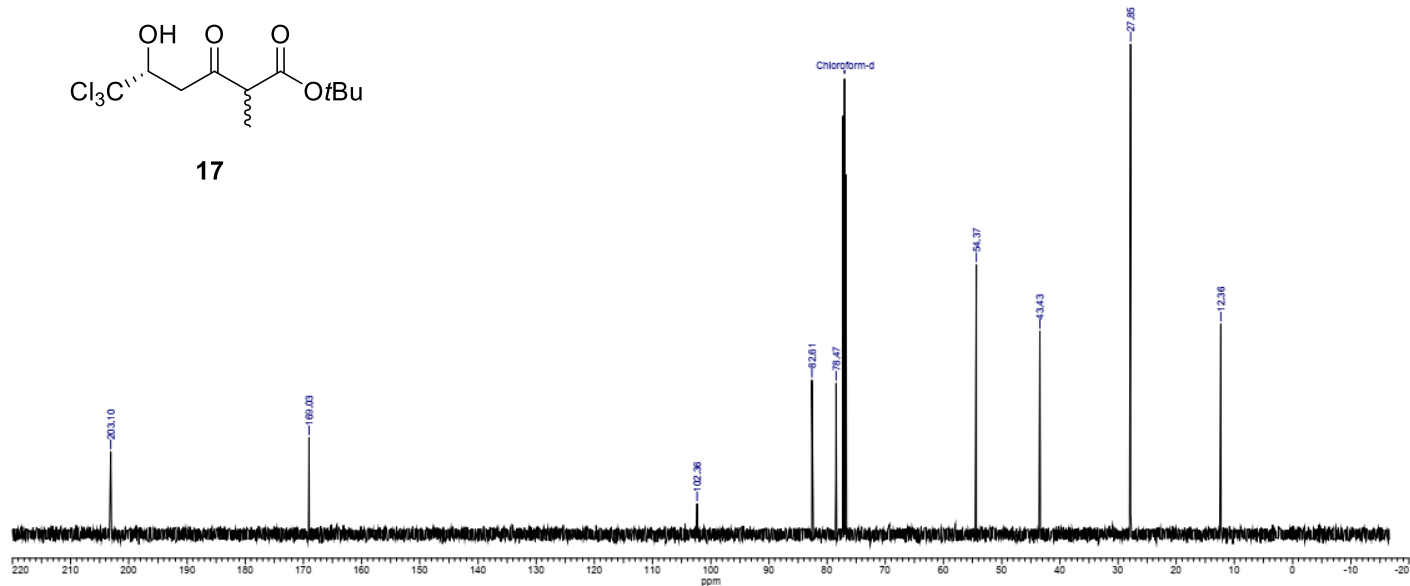

| No. | (ppm)  | (Hz)    | Height |
|-----|--------|---------|--------|
| 1   | 12.36  | 1554.4  | 0.4287 |
| 2   | 27.85  | 3502.6  | 1.0000 |
| 3   | 43.43  | 5462.8  | 0.4142 |
| 4   | 54.37  | 6837.6  | 0.5501 |
| 5   | 78.47  | 9869.0  | 0.3083 |
| 6   | 82.61  | 10389.7 | 0.3144 |
| 7   | 102.36 | 12874.1 | 0.0621 |
| 8   | 169.03 | 21258.4 | 0.1971 |
| 9   | 203.10 | 25543.5 | 0.1682 |

$^1\text{H}$  NMR, DMSO- $d_6$ , 500MHz

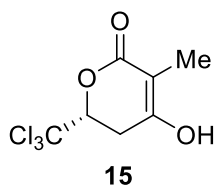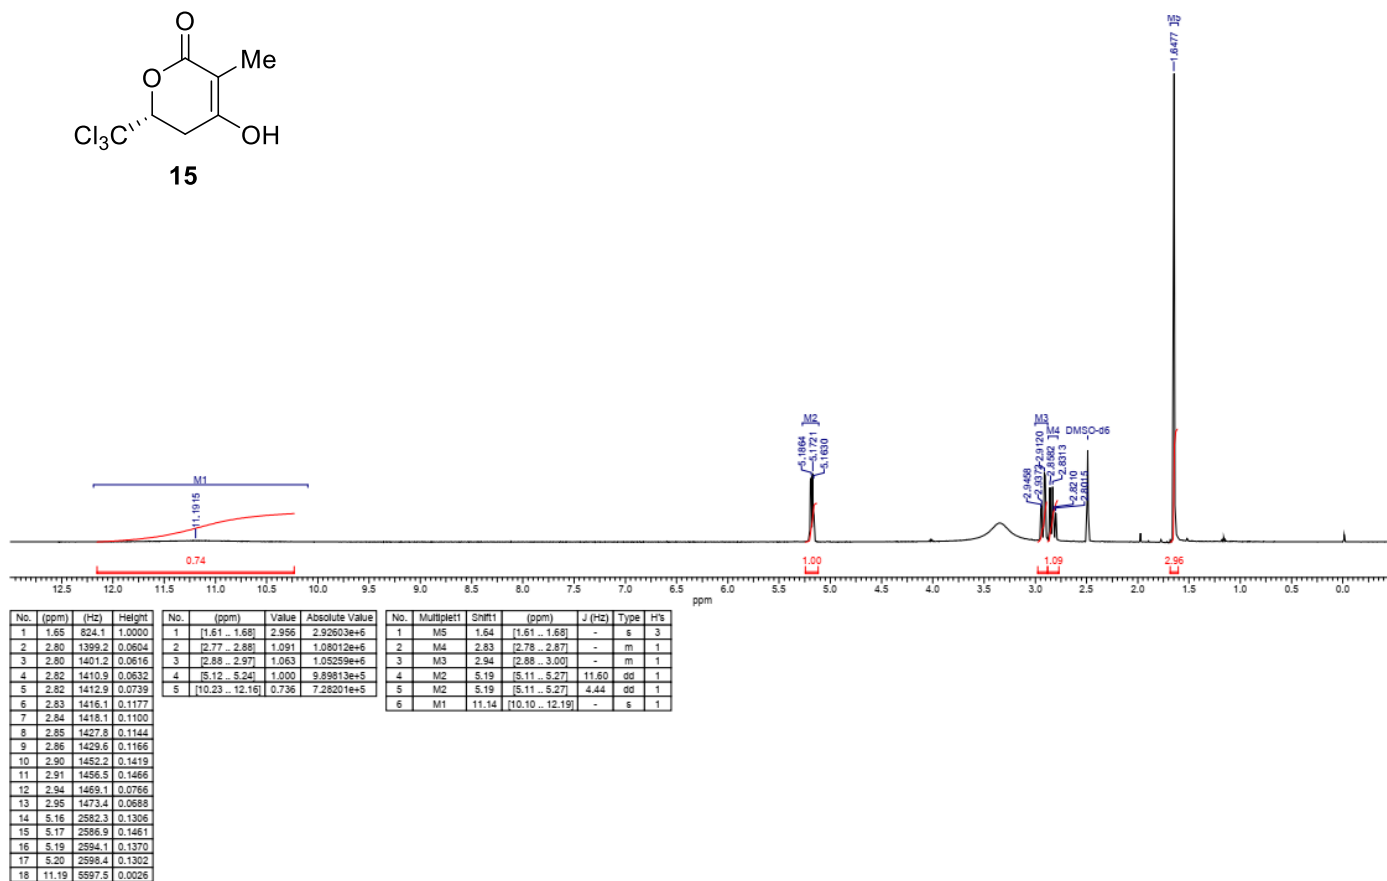

$^{13}\text{C}$  NMR, DMSO- $d_6$ , 125MHz

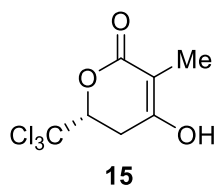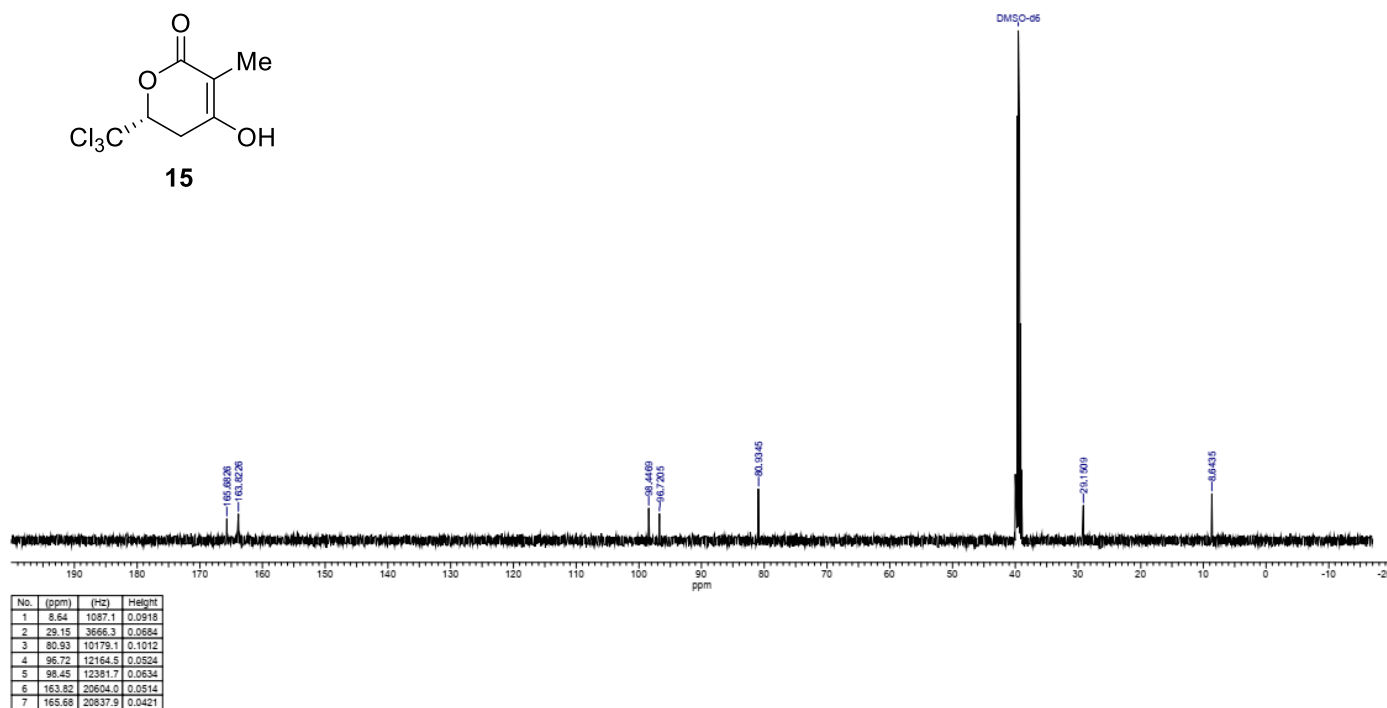

$^1\text{H}$  NMR,  $\text{CDCl}_3$ , 500MHz

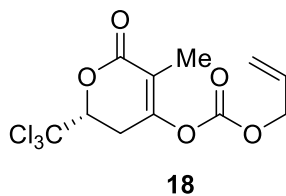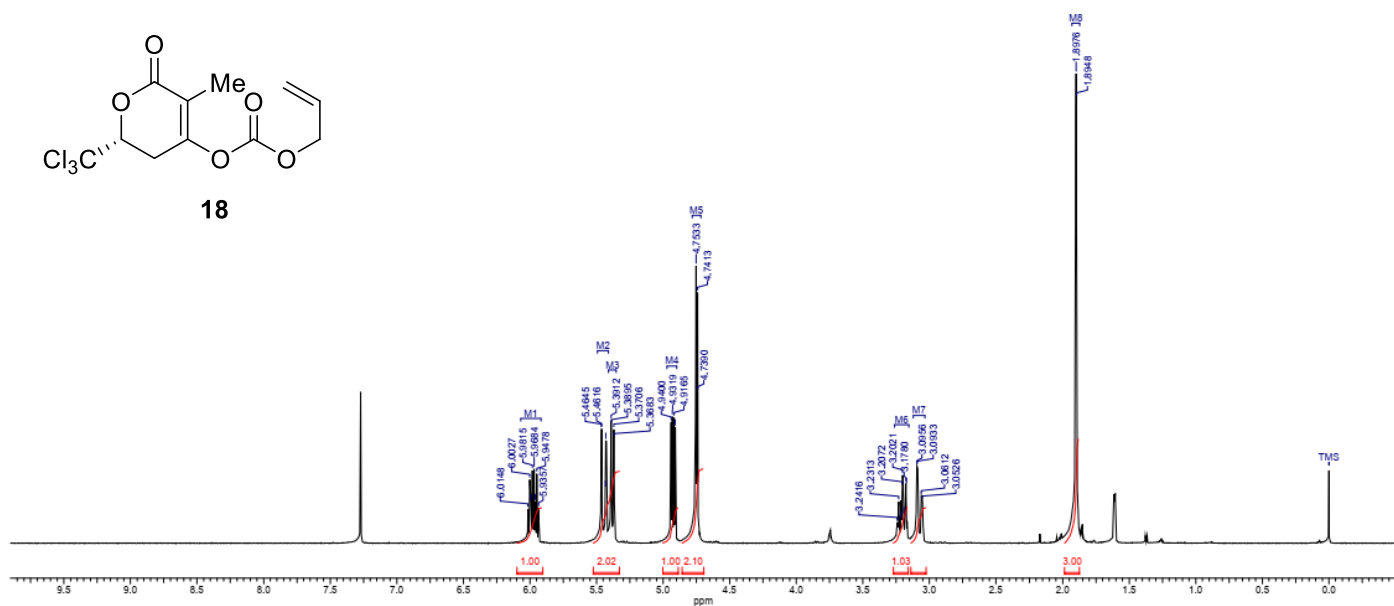

| ppm |       |        |        |     |       |        |        |     |       |        |        |     |       |        |        |     |               |       |                |               |           |        |               |        |      |     |
|-----|-------|--------|--------|-----|-------|--------|--------|-----|-------|--------|--------|-----|-------|--------|--------|-----|---------------|-------|----------------|---------------|-----------|--------|---------------|--------|------|-----|
| No. | (ppm) | (Hz)   | Height | No. | (ppm)         | Value | Absolute Value | No.           | Multiplet | Shift1 | (ppm)         | J (Hz) | Type | H's |
| 1   | 1.89  | 946.6  | 0.8179 | 17  | 3.19  | 1596.4 | 0.0590 | 33  | 4.91  | 2454.7 | 0.2462 | 49  | 5.46  | 2730.2 | 0.1104 | 1   | [1.87 - 1.99] | 3.001 | 2.56645e+6     | 1             | M8        | 1.90   | [1.87 - 1.93] | 2.58   | dd   | 3   |
| 2   | 1.89  | 947.7  | 0.8480 | 18  | 3.20  | 1599.0 | 0.1271 | 34  | 4.92  | 2459.0 | 0.2672 | 50  | 5.46  | 2731.7 | 0.2434 | 2   | [3.03 - 3.14] | 0.997 | 8.52778e+5     | 2             | M8        | 1.90   | [1.87 - 1.93] | 1.15   | dd   | 3   |
| 3   | 1.90  | 949.1  | 1.0000 | 19  | 3.20  | 1601.5 | 0.1448 | 35  | 4.93  | 2466.8 | 0.2693 | 51  | 5.46  | 2733.1 | 0.2421 | 3   | [3.16 - 3.27] | 1.031 | 8.81359e+5     | 3             | M7        | 3.08   | [3.04 - 3.12] | 17.33  | ddd  | 1   |
| 4   | 1.90  | 950.3  | 0.9072 | 20  | 3.21  | 1604.1 | 0.1195 | 36  | 4.94  | 2470.8 | 0.2578 | 52  | 5.47  | 2734.3 | 0.1290 | 4   | [4.89 - 4.86] | 2.101 | 1.79629e+6     | 4             | M7        | 3.08   | [3.04 - 3.12] | 4.15   | ddd  | 1   |
| 5   | 3.05  | 1523.7 | 0.0832 | 21  | 3.21  | 1606.7 | 0.0936 | 37  | 5.37  | 2684.1 | 0.0934 | 53  | 5.94  | 2968.8 | 0.0743 | 5   | [4.89 - 5.00] | 0.998 | 8.53159e+5     | 5             | M7        | 3.08   | [3.04 - 3.12] | 1.15   | ddd  | 1   |
| 6   | 3.05  | 1526.8 | 0.0887 | 22  | 3.22  | 1609.3 | 0.0494 | 38  | 5.37  | 2685.0 | 0.2221 | 54  | 5.95  | 2974.8 | 0.1476 | 6   | [5.33 - 5.52] | 2.023 | 1.72974e+6     | 6             | M6        | 3.21   | [3.16 - 3.26] | -      | m    | 1   |
| 7   | 3.06  | 1528.9 | 0.0991 | 23  | 3.23  | 1613.6 | 0.0461 | 39  | 5.37  | 2686.1 | 0.2426 | 55  | 5.96  | 2979.1 | 0.0837 | 7   | [5.90 - 6.10] | 1.000 | 8.55125e+5     | 7             | M5        | 4.75   | [4.72 - 4.78] | 5.94   | dt   | 2   |
| 8   | 3.06  | 1531.1 | 0.1000 | 24  | 3.23  | 1616.2 | 0.0885 | 40  | 5.37  | 2687.3 | 0.1217 | 56  | 5.96  | 2980.6 | 0.0867 | 8   | M5            | 4.75  | [4.72 - 4.78]  | 1.18          | dt        | 2      |               |        |      |     |
| 9   | 3.09  | 1543.1 | 0.1534 | 25  | 3.24  | 1618.7 | 0.0876 | 41  | 5.39  | 2694.4 | 0.1133 | 57  | 5.97  | 2985.1 | 0.1580 | 9   | M5            | 4.75  | [4.72 - 4.78]  | 1.18          | dt        | 2      |               |        |      |     |
| 10  | 3.09  | 1544.3 | 0.1579 | 26  | 3.24  | 1621.3 | 0.0432 | 42  | 5.39  | 2695.6 | 0.2517 | 58  | 5.98  | 2991.7 | 0.1546 | 10  | M4            | 4.93  | [4.90 - 4.97]  | 11.89         | dd        | 1      |               |        |      |     |
| 11  | 3.09  | 1547.1 | 0.1630 | 27  | 4.74  | 2370.2 | 0.3223 | 43  | 5.39  | 2696.5 | 0.2613 | 59  | 5.99  | 2996.3 | 0.0835 | 11  | M4            | 4.93  | [4.90 - 4.97]  | 4.15          | dd        | 1      |               |        |      |     |
| 12  | 3.10  | 1548.3 | 0.1640 | 28  | 4.74  | 2371.4 | 0.5335 | 44  | 5.39  | 2697.6 | 0.1428 | 60  | 5.99  | 2997.7 | 0.0864 | 12  | M3            | 5.38  | [5.35 - 5.41]  | 10.38         | ddd       | 1      |               |        |      |     |
| 13  | 3.17  | 1584.6 | 0.0470 | 29  | 4.74  | 2372.8 | 0.3644 | 45  | 5.42  | 2713.1 | 0.0986 | 61  | 6.00  | 3002.3 | 0.1349 | 13  | M3            | 5.38  | [5.35 - 5.41]  | 2.08          | ddd       | 1      |               |        |      |     |
| 14  | 3.17  | 1586.9 | 0.1220 | 30  | 4.75  | 2376.3 | 0.3752 | 46  | 5.43  | 2714.5 | 0.2169 | 62  | 6.01  | 3008.3 | 0.0724 | 14  | M3            | 5.38  | [5.35 - 5.41]  | 1.00          | ddd       | 1      |               |        |      |     |
| 15  | 3.18  | 1589.5 | 0.1269 | 31  | 4.75  | 2377.4 | 0.5911 | 47  | 5.43  | 2715.9 | 0.2173 |     |       |        |        | 15  | M2            | 5.45  | [5.41 - 5.49]  | 17.18         | ddd       | 1      |               |        |      |     |
| 16  | 3.18  | 1592.1 | 0.0598 | 32  | 4.76  | 2378.5 | 0.4051 | 48  | 5.43  | 2717.1 | 0.1154 |     |       |        |        | 16  | M2            | 5.45  | [5.41 - 5.49]  | 2.72          | ddd       | 1      |               |        |      |     |
|     |       |        |        |     |       |        |        |     |       |        |        |     |       |        |        |     | 17            | M2    | 5.45           | [5.41 - 5.49] | 1.29      | ddd    | 1             |        |      |     |
|     |       |        |        |     |       |        |        |     |       |        |        |     |       |        |        |     | 18            | M1    | 5.99           | [5.92 - 6.07] | -         | m      | 1             |        |      |     |

$^{13}\text{C}$  NMR,  $\text{CDCl}_3$ , 125MHz

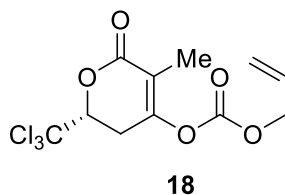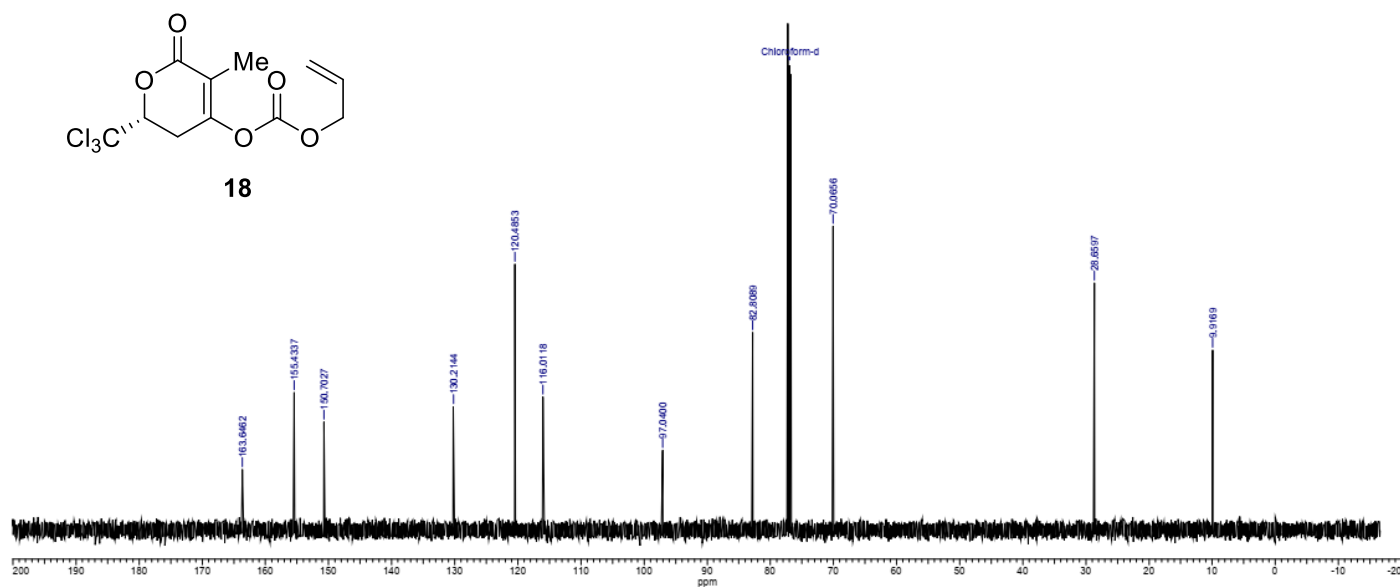

| No. | (ppm)  | (Hz)    | Height |
|-----|--------|---------|--------|
| 1   | 9.92   | 1247.3  | 0.3552 |
| 2   | 28.66  | 3604.5  | 0.4877 |
| 3   | 70.07  | 8812.2  | 0.5995 |
| 4   | 82.81  | 10414.9 | 0.3900 |
| 5   | 97.04  | 12204.7 | 0.1570 |
| 6   | 116.01 | 14590.0 | 0.2625 |
| 7   | 120.49 | 15153.4 | 0.5248 |
| 8   | 130.21 | 16377.1 | 0.2437 |
| 9   | 150.70 | 18953.9 | 0.2130 |
| 10  | 155.43 | 19548.9 | 0.2715 |
| 11  | 163.65 | 20581.8 | 0.1192 |



$^1\text{H}$  NMR,  $\text{CDCl}_3$ , 500MHz

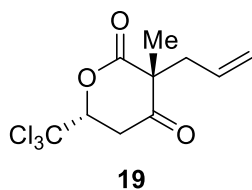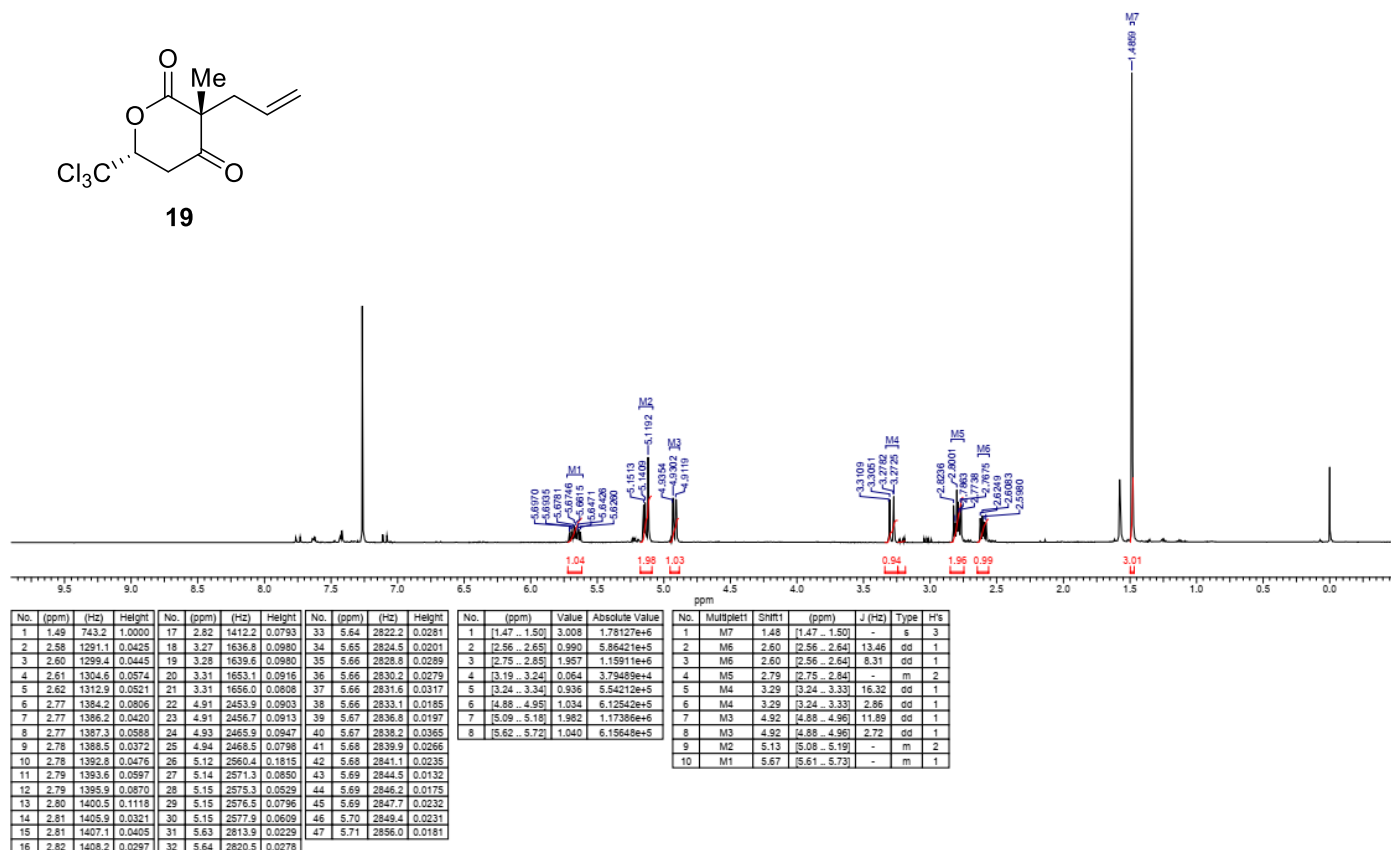

$^{13}\text{C}$  NMR,  $\text{CDCl}_3$ , 125MHz

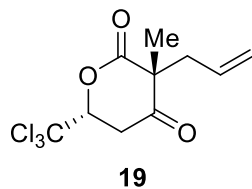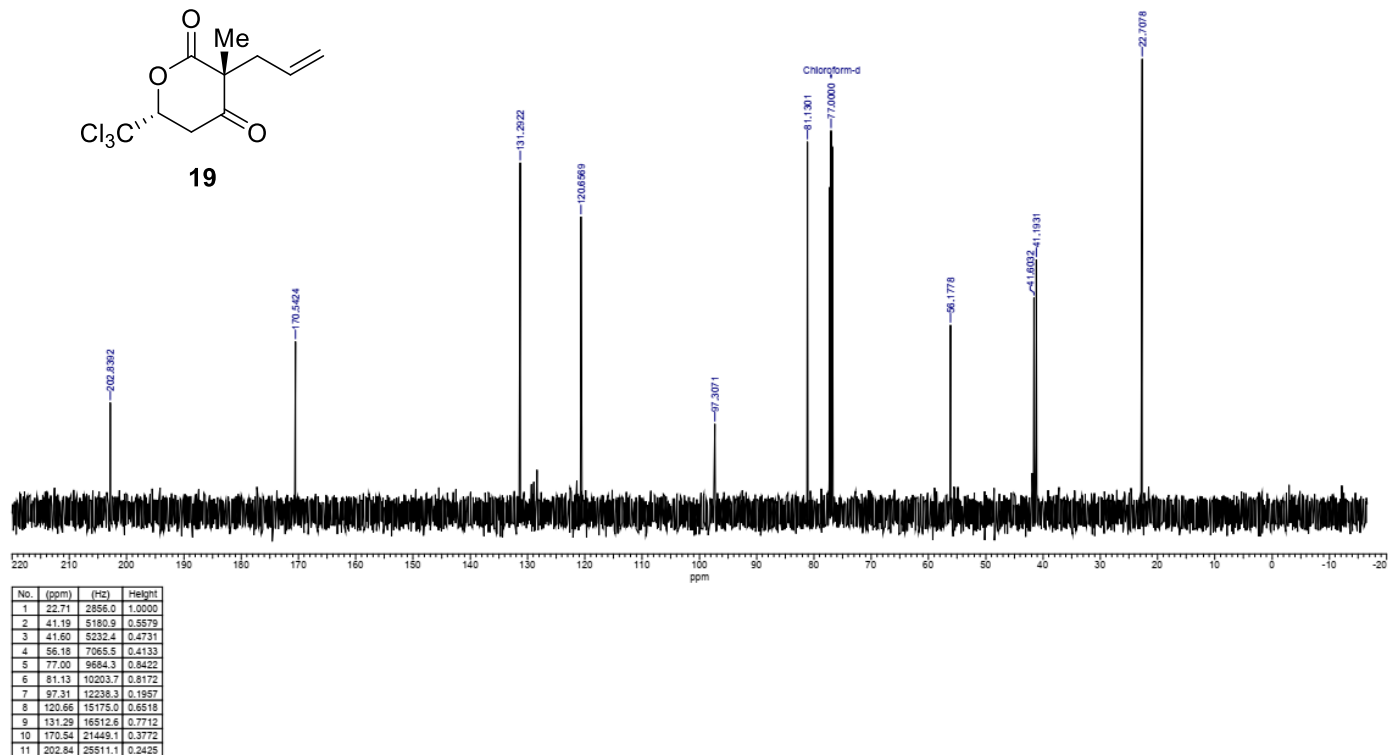

$^1\text{H}$  NMR,  $\text{CDCl}_3$ , 500MHz

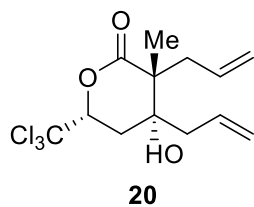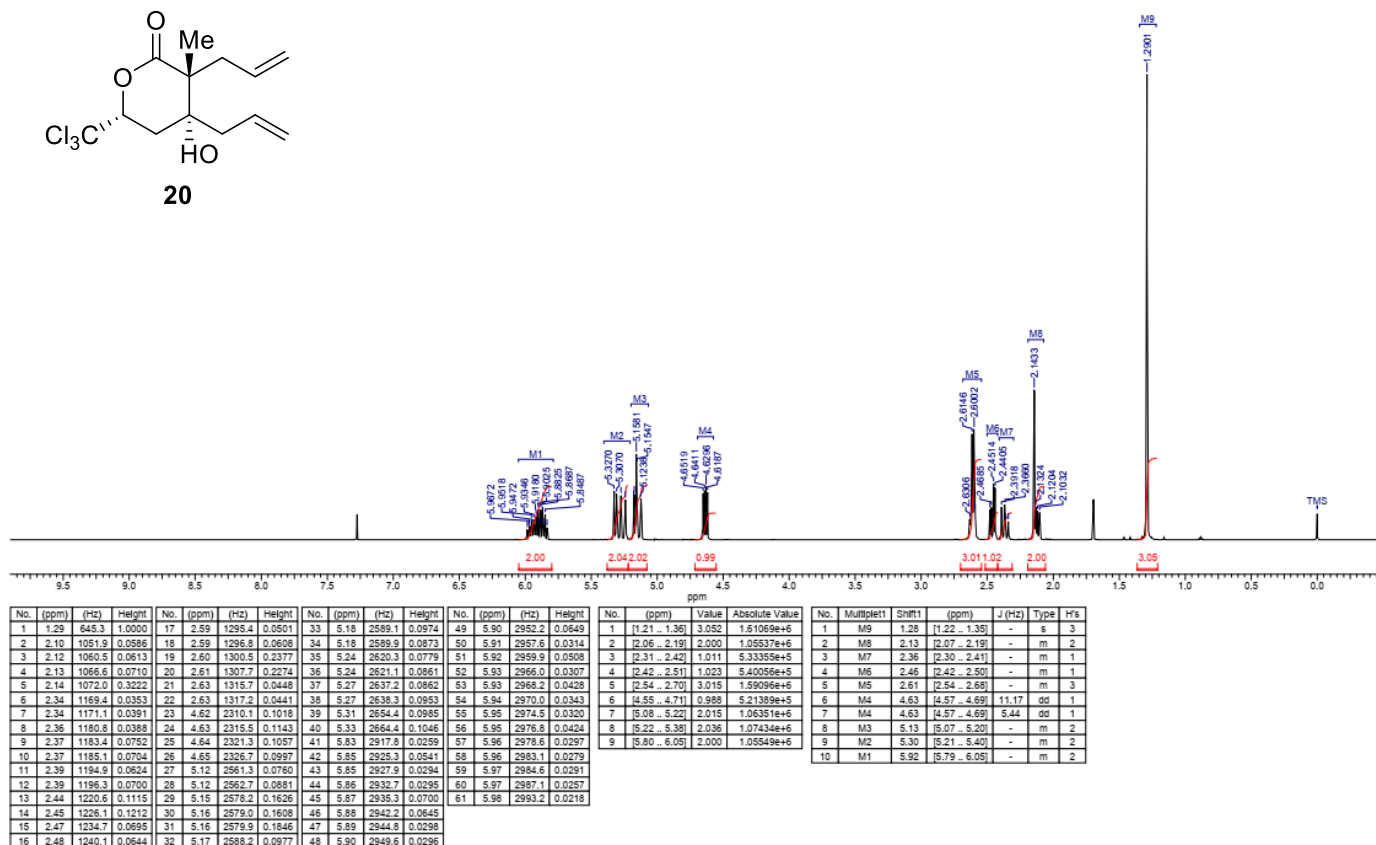

$^{13}\text{C}$  NMR,  $\text{CDCl}_3$ , 125MHz

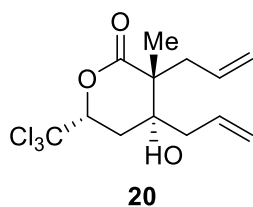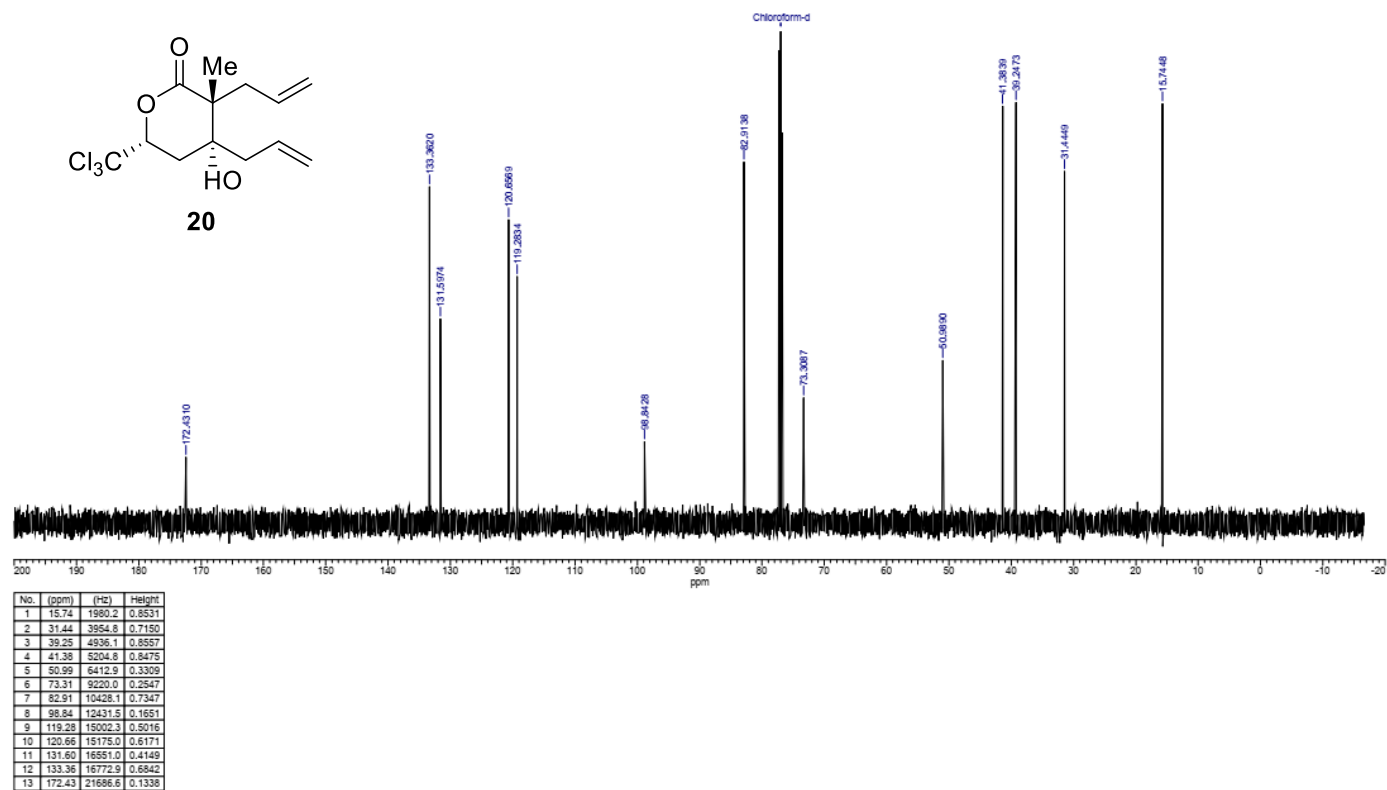

$^1\text{H}$  NMR,  $\text{CDCl}_3$ , 500MHz

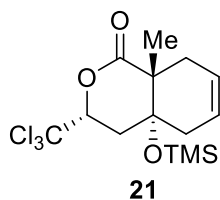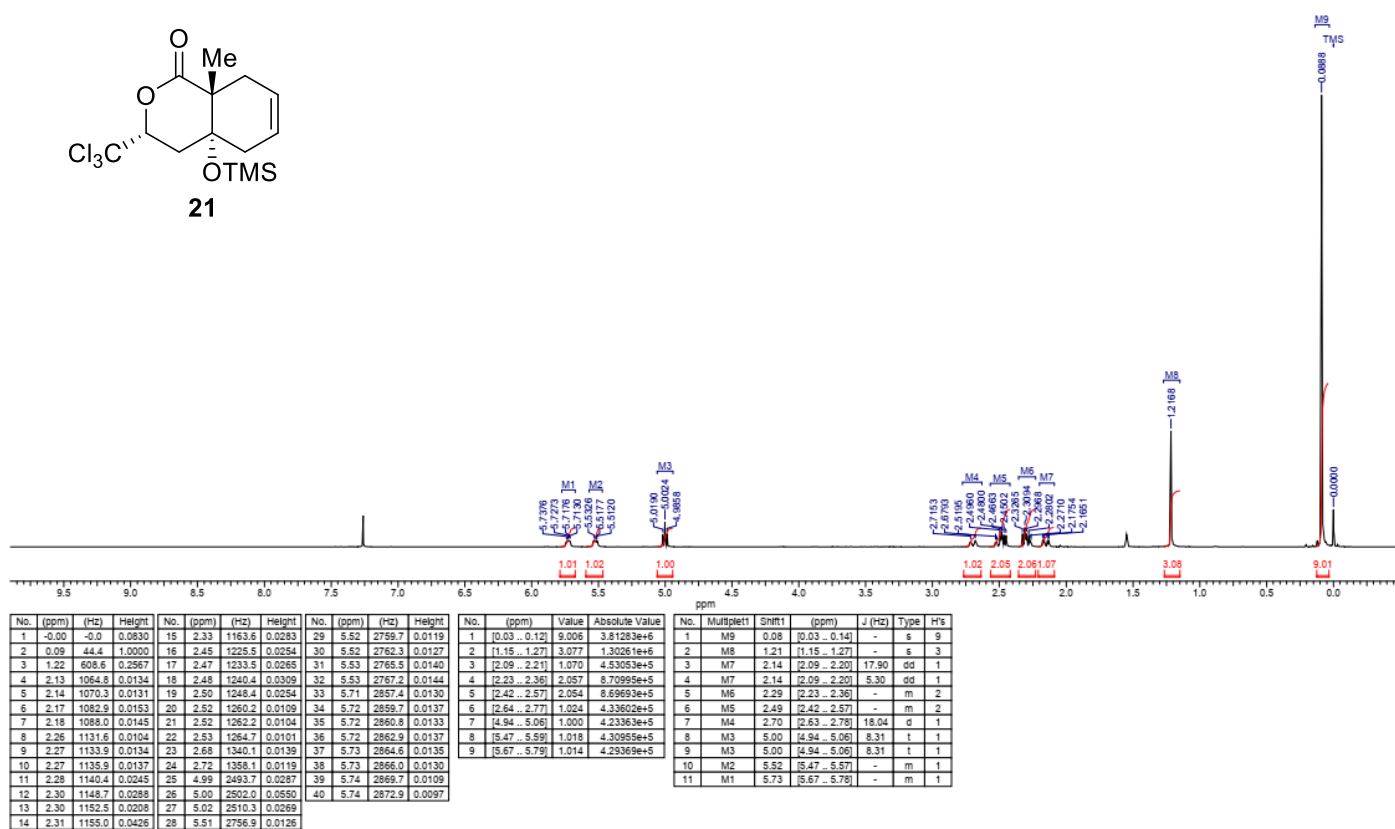

$^{13}\text{C}$  NMR,  $\text{CDCl}_3$ , 125MHz

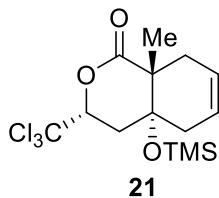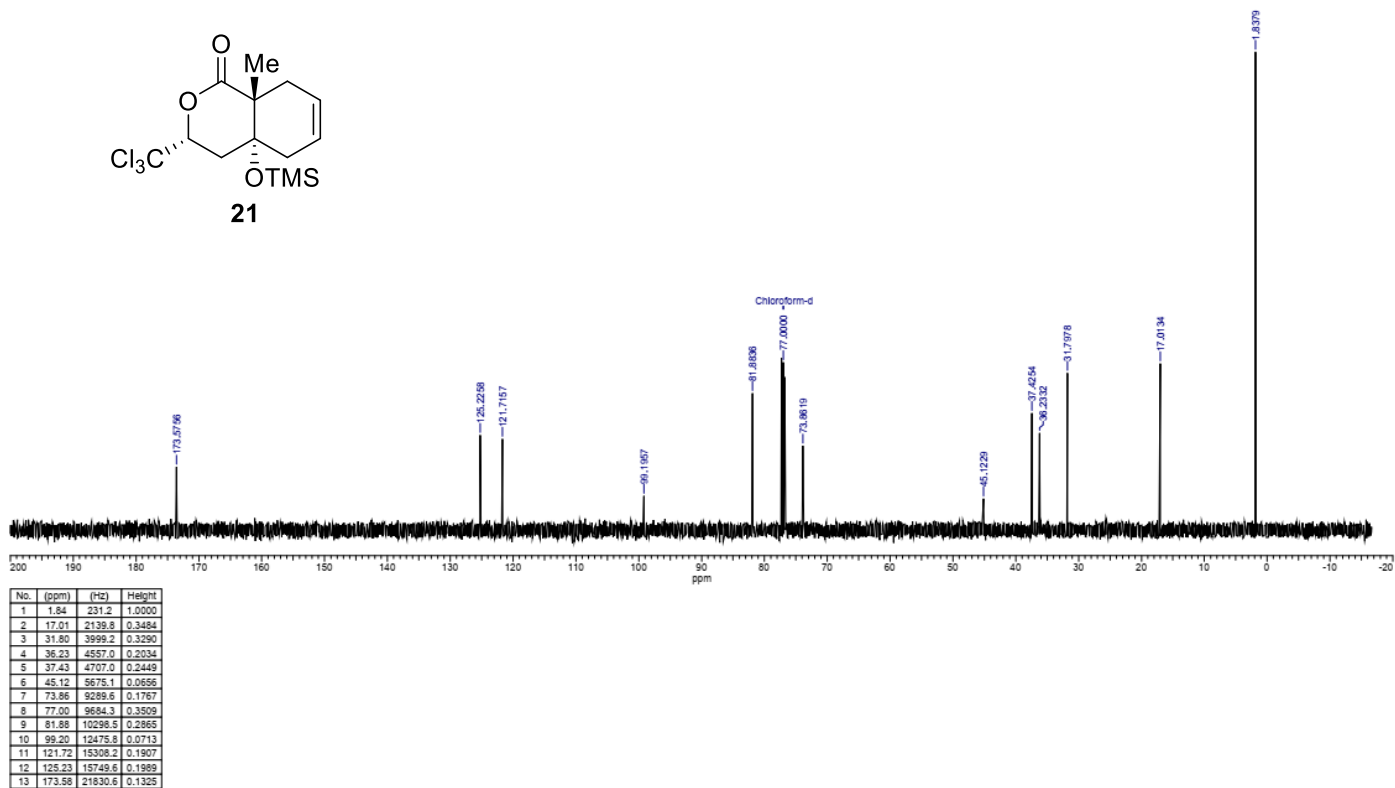

$^1\text{H}$  NMR,  $\text{CDCl}_3$ , 500MHz

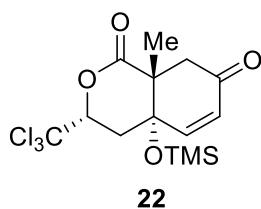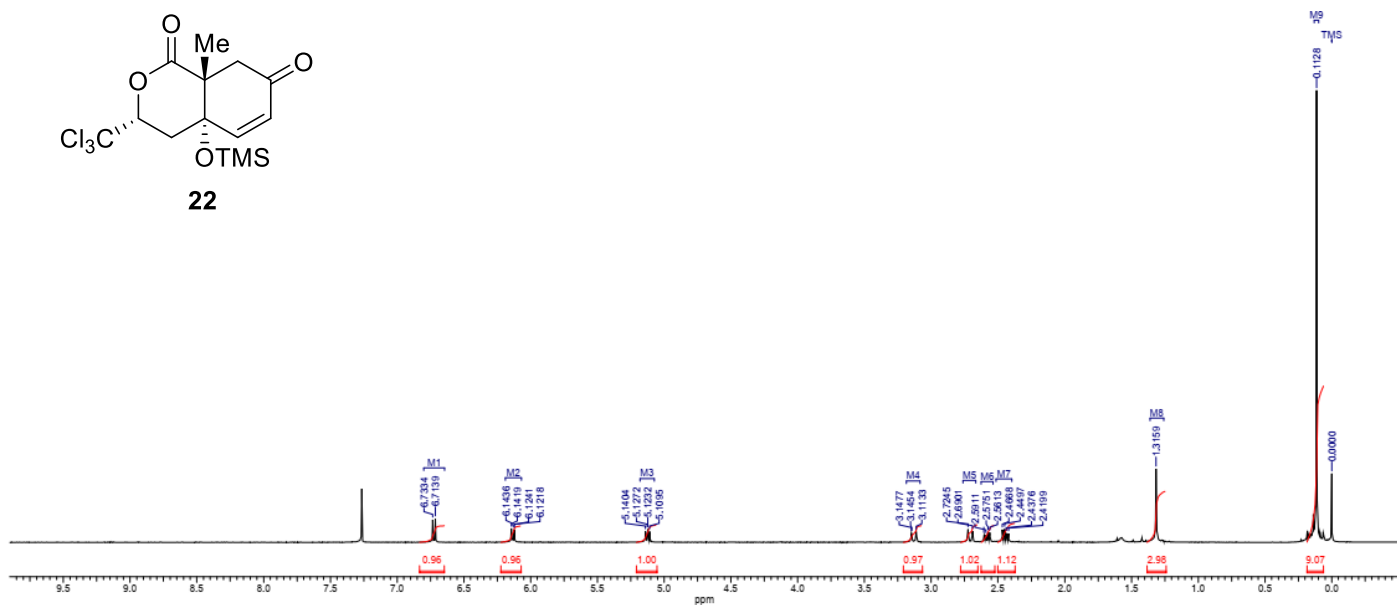

$^{13}\text{C}$  NMR,  $\text{CDCl}_3$ , 125MHz

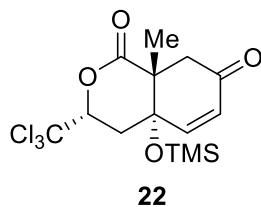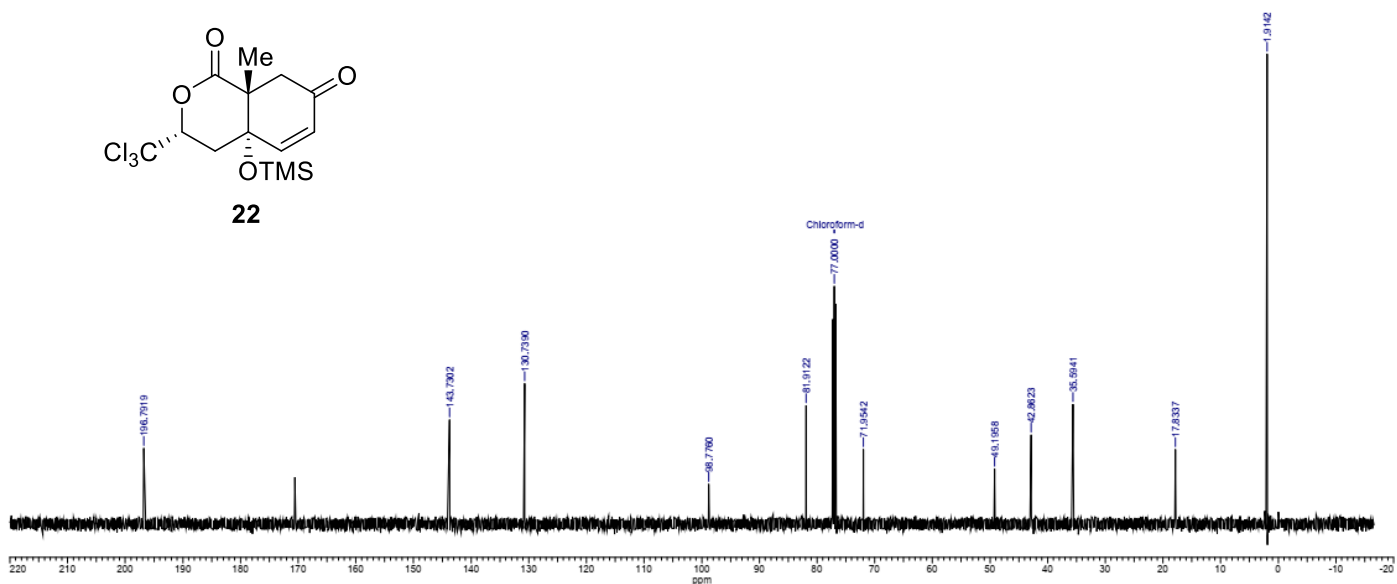

<sup>1</sup>H NMR, CDCl<sub>3</sub>, 500MHz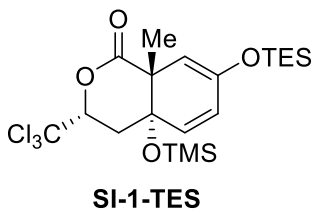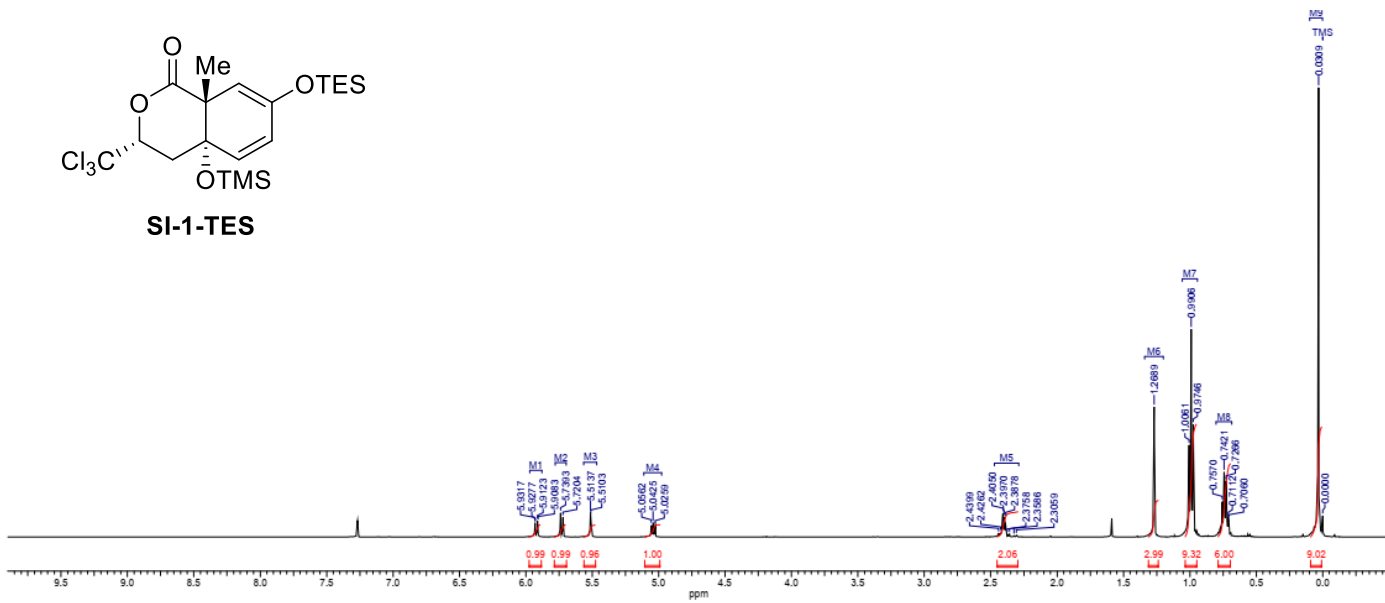[illegible] $^{13}\text{C}$  NMR,  $\text{CDCl}_3$ , 125MHz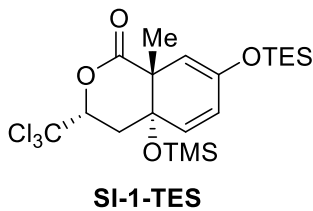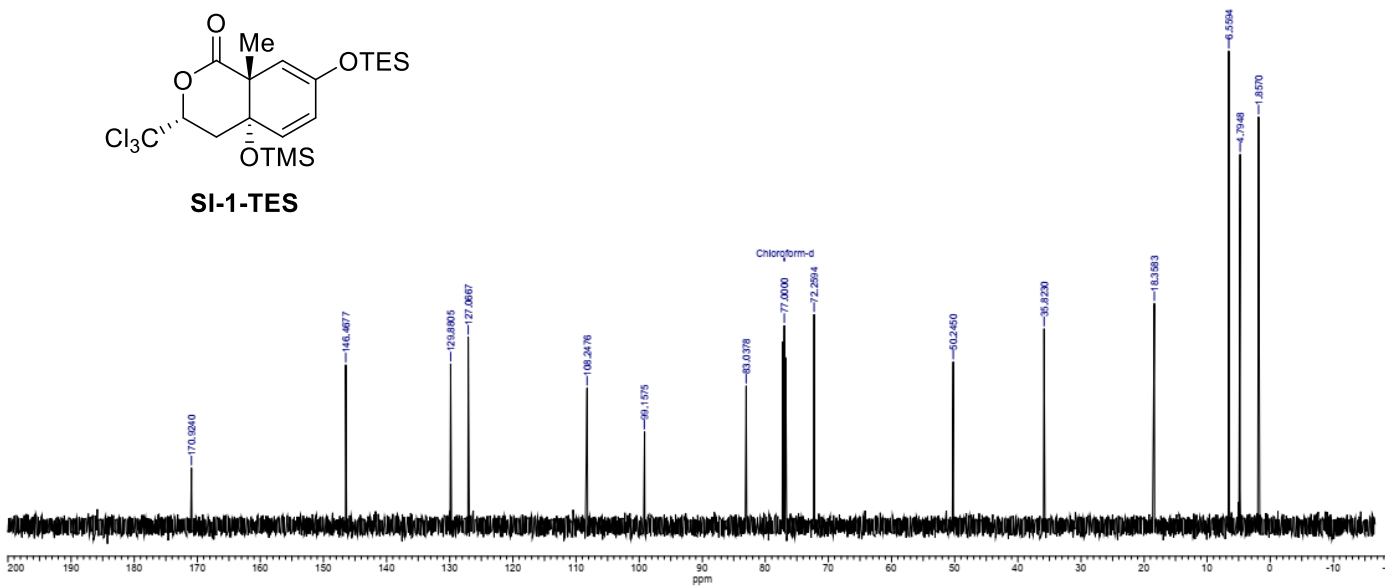

| No. | (ppm)  | (Hz)    | Height |
|-----|--------|---------|--------|
| 1   | 1.86   | 233.6   | 0.8616 |
| 2   | 4.79   | 603.0   | 0.7825 |
| 3   | 6.56   | 825.0   | 1.0000 |
| 4   | 18.36  | 2308.9  | 0.4684 |
| 5   | 35.82  | 4505.5  | 0.4149 |
| 6   | 50.24  | 6319.3  | 0.3453 |
| 7   | 72.26  | 9088.1  | 0.4451 |
| 8   | 77.00  | 9684.3  | 0.4216 |
| 9   | 83.04  | 10443.7 | 0.2943 |
| 10  | 99.16  | 12471.0 | 0.1971 |
| 11  | 108.25 | 13614.3 | 0.2897 |
| 12  | 127.07 | 15981.2 | 0.3973 |
| 13  | 129.88 | 16335.1 | 0.3407 |
| 14  | 146.47 | 18421.2 | 0.3387 |
| 15  | 170.92 | 21497.1 | 0.1217 |

<sup>1</sup>H NMR, Acetone-*d*<sub>6</sub>, 500MHz

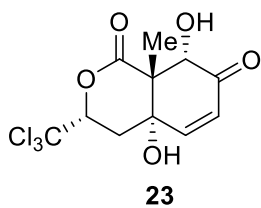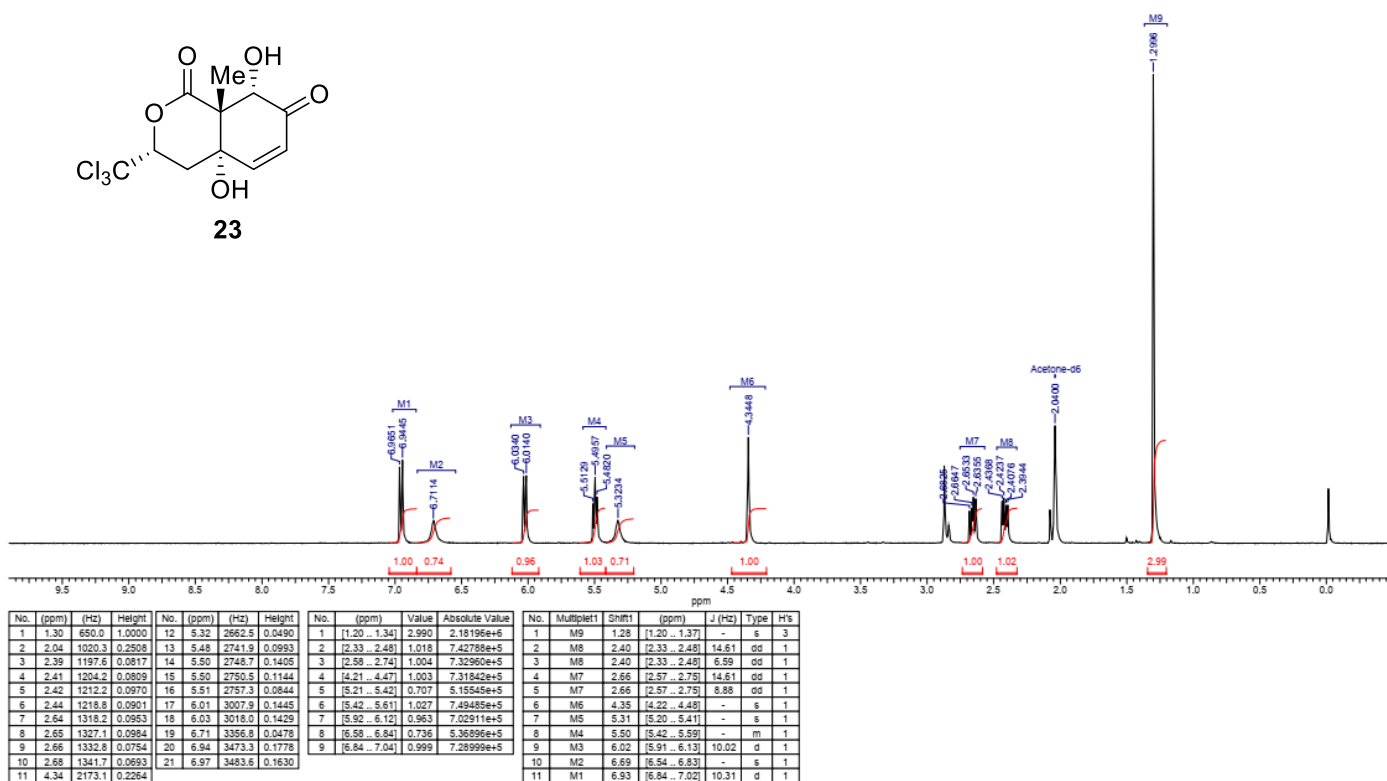

<sup>13</sup>C NMR, Acetone-*d*<sub>6</sub>, 125MHz

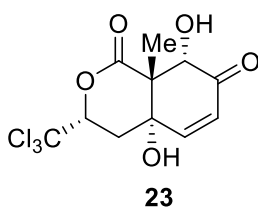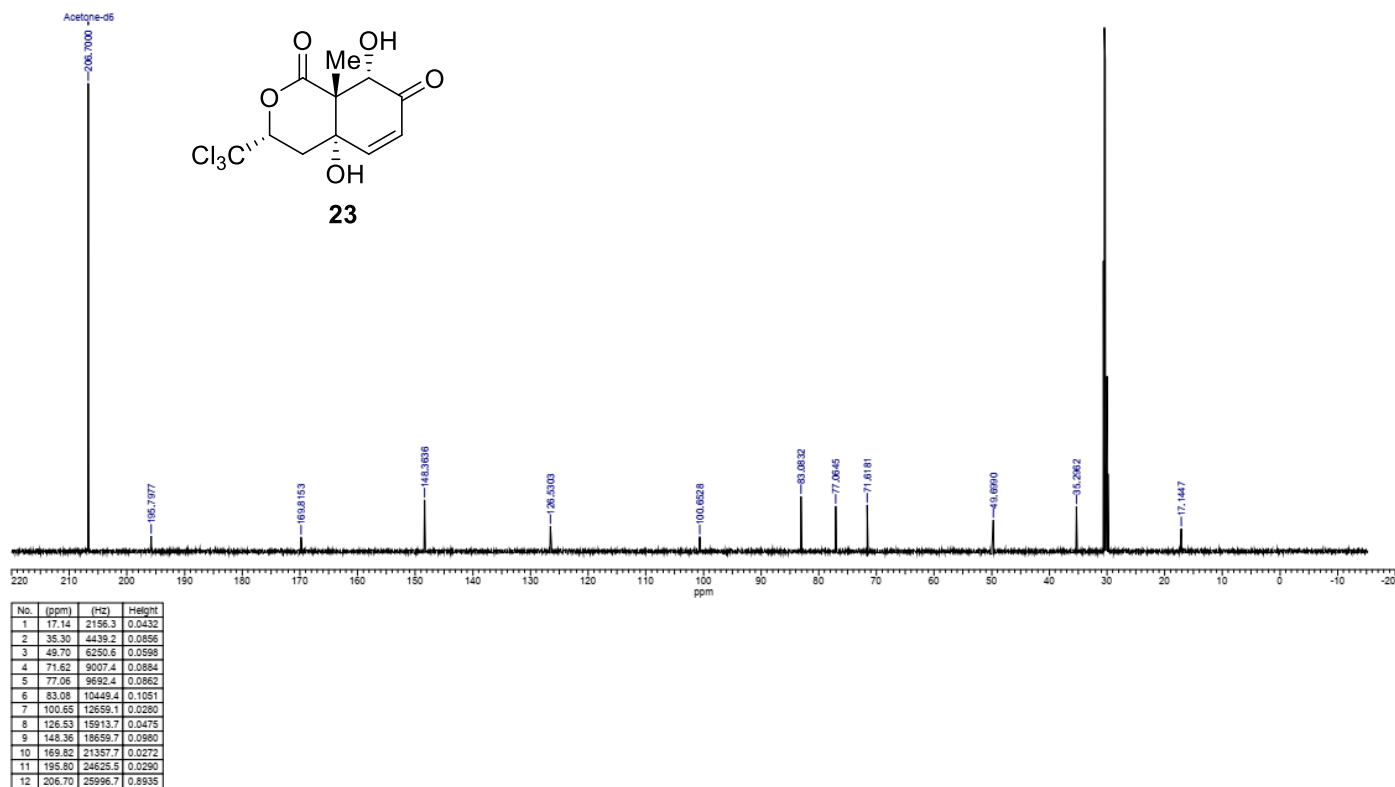

$^1\text{H}$  NMR,  $\text{CDCl}_3$ , 500MHz

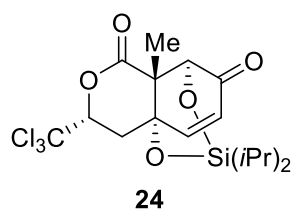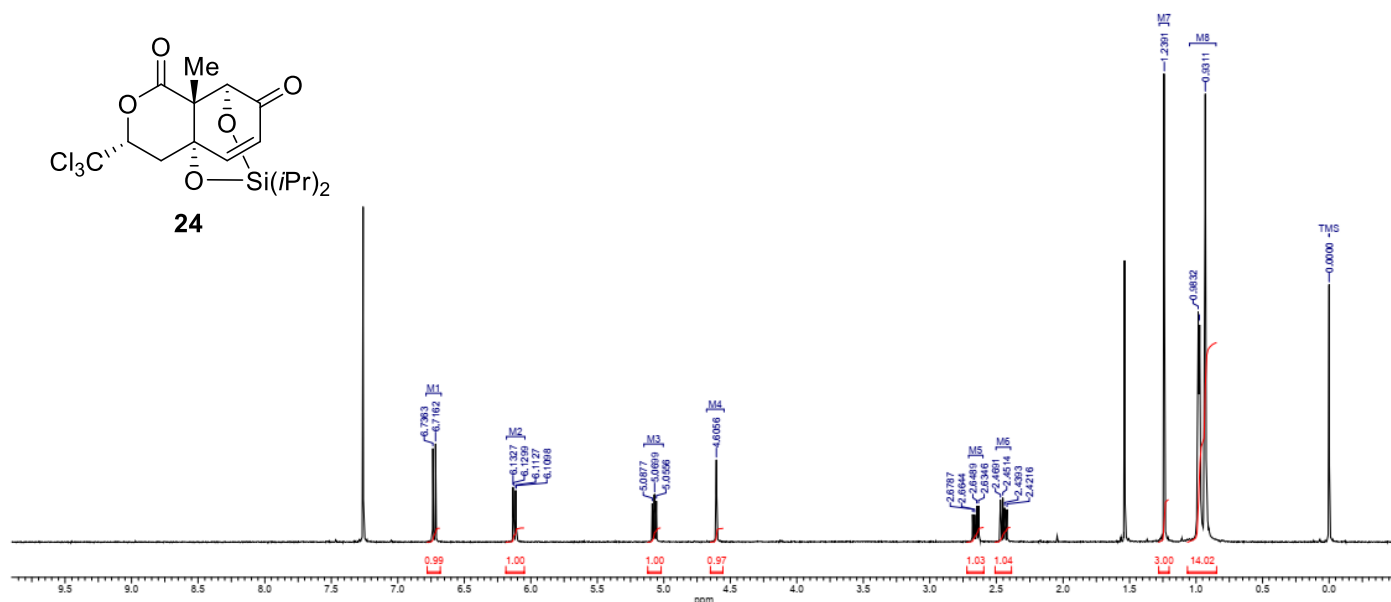

| ppm |       |        |        |     |       |        |        |     |              |        |                |      |           |        |              |        |      |              |       |    |   |
|-----|-------|--------|--------|-----|-------|--------|--------|-----|--------------|--------|----------------|------|-----------|--------|--------------|--------|------|--------------|-------|----|---|
| No. | (ppm) | (Hz)   | Height | No. | (ppm) | (Hz)   | Height | No. | (ppm)        | Value  | Absolute Value | No.  | Multiplet | Shift1 | (ppm)        | J (Hz) | Type | H's          |       |    |   |
| 1   | -0.00 | -0.0   | 0.5502 | 13  | 2.68  | 1339.8 | 0.0592 | 1   | [0.85..1.06] | 14.018 | 3.79373e+6     | 1    | M8        | 0.95   | [0.85..1.05] | -      | m    | 14           |       |    |   |
| 2   | 0.93  | 465.7  | 0.9570 | 14  | 4.61  | 2303.5 | 0.0762 | 2   | [1.20..1.28] | 3.004  | 8.13009e+5     | 2    | M7        | 1.24   | [1.20..1.28] | -      | s    | 3            |       |    |   |
| 3   | 0.97  | 467.2  | 0.4883 | 15  | 5.06  | 2528.6 | 0.0876 | 3   | [2.39..2.51] | 1.037  | 2.80705e+5     | 3    | M6        | 2.45   | [2.39..2.50] | 14.89  | dd   | 1            |       |    |   |
| 4   | 0.98  | 491.7  | 0.4822 | 16  | 5.07  | 2538.8 | 0.1016 | 4   | [2.59..2.72] | 1.034  | 2.79811e+5     | 4    | M6        | 2.45   | [2.39..2.50] | 8.88   | dd   | 1            |       |    |   |
| 5   | 1.24  | 619.8  | 1.0000 | 17  | 5.07  | 2537.2 | 0.1007 | 5   | [4.56..4.65] | 0.972  | 2.62946e+5     | 5    | M5        | 2.66   | [2.60..2.71] | 14.89  | dd   | 1            |       |    |   |
| 6   | 2.42  | 1211.2 | 0.0703 | 18  | 5.09  | 2544.7 | 0.0827 | 6   | [5.02..5.12] | 1.000  | 2.70668e+5     | 6    | M5        | 2.66   | [2.60..2.71] | 7.16   | dd   | 1            |       |    |   |
| 7   | 2.44  | 1220.1 | 0.0732 | 19  | 6.11  | 3055.9 | 0.1095 | 7   | [6.05..6.19] | 1.000  | 2.70638e+5     | 7    | M4        | 4.61   | [4.55..4.68] | -      | s    | 1            |       |    |   |
| 8   | 2.45  | 1226.1 | 0.0950 | 20  | 6.11  | 3057.3 | 0.1105 | 8   | [6.68..6.78] | 0.989  | 2.67532e+5     | 8    | M3        | 5.08   | [5.00..5.15] | 8.74   | dd   | 1            |       |    |   |
| 9   | 2.47  | 1235.0 | 0.0902 | 21  | 6.13  | 3065.9 | 0.1159 | 9   | M3           | 5.08   | [5.00..5.15]   | 7.30 | dd        | 1      | 10           | M2     | 6.11 | [6.04..6.18] | 10.02 | dd | 1 |
| 10  | 2.63  | 1317.7 | 0.0778 | 22  | 6.13  | 3067.3 | 0.1179 | 11  | M2           | 6.11   | [6.04..6.18]   | 1.43 | dd        | 1      | 12           | M1     | 6.73 | [6.67..6.79] | 10.02 | d  | 1 |
| 11  | 2.65  | 1324.9 | 0.0777 | 23  | 6.72  | 3359.2 | 0.2106 |     |              |        |                |      |           |        |              |        |      |              |       |    |   |
| 12  | 2.66  | 1332.6 | 0.0598 | 24  | 6.74  | 3369.2 | 0.2003 |     |              |        |                |      |           |        |              |        |      |              |       |    |   |

$^{13}\text{C}$  NMR,  $\text{CDCl}_3$ , 125MHz

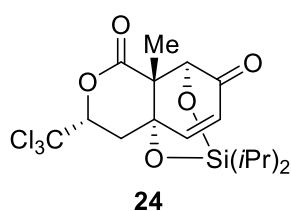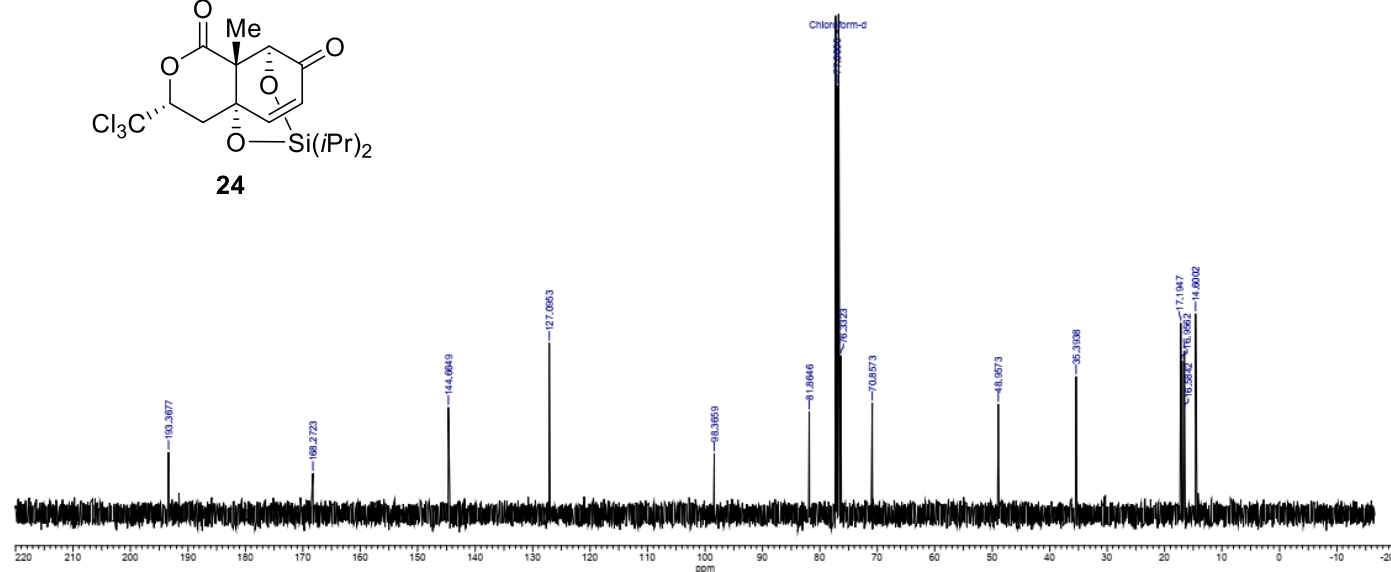

| No. | (ppm)  | (Hz)    | Height |
|-----|--------|---------|--------|
| 1   | 14.50  | 1824.3  | 0.3918 |
| 2   | 14.60  | 1836.3  | 0.4006 |
| 3   | 16.50  | 2075.0  | 0.2421 |
| 4   | 16.55  | 2081.0  | 0.3258 |
| 5   | 16.58  | 2085.5  | 0.2075 |
| 6   | 16.96  | 2132.6  | 0.3060 |
| 7   | 17.19  | 2162.6  | 0.3820 |
| 8   | 35.39  | 4451.5  | 0.2752 |
| 9   | 48.96  | 6157.4  | 0.2192 |
| 10  | 70.86  | 8911.7  | 0.2218 |
| 11  | 76.33  | 9600.3  | 0.3166 |
| 12  | 77.00  | 9684.3  | 0.8567 |
| 13  | 81.86  | 10296.1 | 0.2042 |
| 14  | 98.37  | 12371.5 | 0.1206 |
| 15  | 127.10 | 15984.8 | 0.3422 |
| 16  | 144.66 | 18194.5 | 0.2137 |
| 17  | 168.27 | 21163.6 | 0.0810 |
| 18  | 193.37 | 24319.9 | 0.1234 |

$^1\text{H}$  NMR,  $\text{CDCl}_3$ , 500MHz

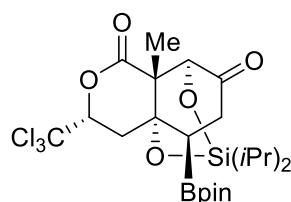

25

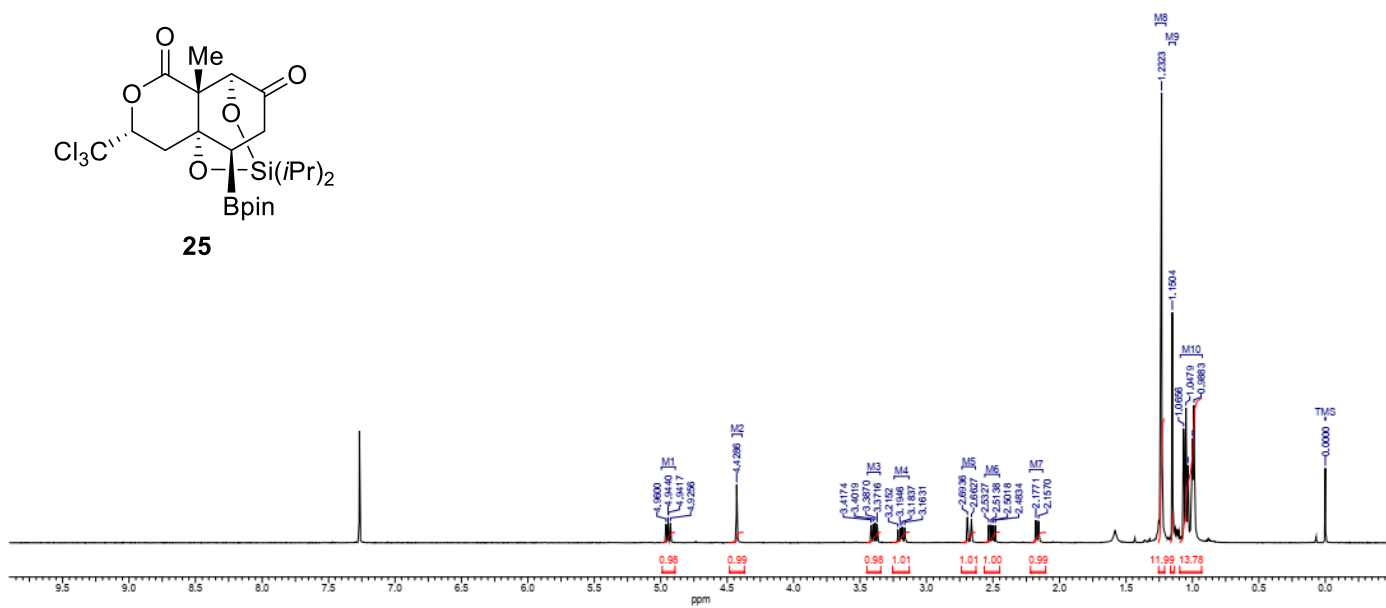

| No. | (ppm)         | (Hz) | Value  | Absolute Value | No. | Multiplet | Shift | (ppm)         | J (Hz) | Type | H's |
|-----|---------------|------|--------|----------------|-----|-----------|-------|---------------|--------|------|-----|
| 1   | [0.93 - 1.09] |      | 13.784 | 3.18991e+5     | 1   | M10       | 1.01  | [0.93 - 1.09] | -      | m    | 14  |
| 2   | [1.14 - 1.17] |      | 3.074  | 7.11444e+5     | 2   | M9        | 1.15  | [1.13 - 1.18] | -      | s    | 3   |
| 3   | [1.21 - 1.25] |      | 11.994 | 2.77567e+6     | 3   | M8        | 1.24  | [1.20 - 1.28] | -      | s    | 12  |
| 4   | [2.10 - 2.22] |      | 0.987  | 2.28462e+5     | 4   | M7        | 2.17  | [2.13 - 2.22] | 10.02  | d    | 1   |
| 5   | [2.45 - 2.57] |      | 1.000  | 2.31434e+5     | 5   | M6        | 2.51  | [2.45 - 2.56] | 15.32  | dd   | 1   |
| 6   | [2.63 - 2.74] |      | 1.005  | 2.32629e+5     | 6   | M5        | 2.51  | [2.45 - 2.56] | 9.31   | dd   | 1   |
| 7   | [3.13 - 3.25] |      | 1.005  | 2.32591e+5     | 7   | M5        | 2.68  | [2.63 - 2.73] | 15.47  | d    | 1   |
| 8   | [3.35 - 3.45] |      | 0.976  | 2.25908e+5     | 8   | M4        | 3.19  | [3.13 - 3.25] | 15.75  | dd   | 1   |
| 9   | [4.37 - 4.48] |      | 0.988  | 2.28563e+5     | 9   | M4        | 3.19  | [3.13 - 3.25] | 10.31  | dd   | 1   |
| 10  | [4.89 - 4.99] |      | 0.979  | 2.26567e+5     | 10  | M3        | 3.40  | [3.35 - 3.45] | 15.18  | dd   | 1   |
|     |               |      |        |                | 11  | M3        | 3.40  | [3.35 - 3.45] | 7.73   | dd   | 1   |
|     |               |      |        |                | 12  | M2        | 4.43  | [4.39 - 4.46] | -      | s    | 1   |
|     |               |      |        |                | 13  | M1        | 4.94  | [4.89 - 5.00] | 9.16   | dd   | 1   |
|     |               |      |        |                | 14  | M1        | 4.94  | [4.89 - 5.00] | 8.02   | dd   | 1   |

$^{13}\text{C}$  NMR,  $\text{CDCl}_3$ , 125MHz

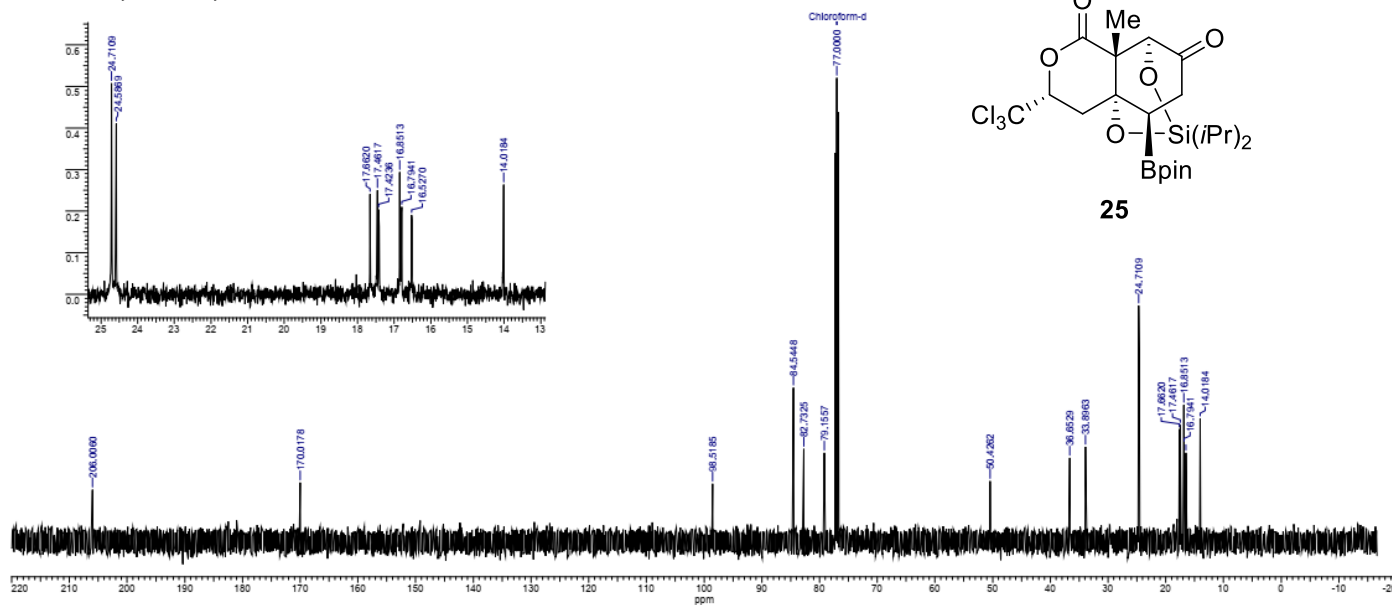

| No. | (ppm) | (Hz)   | Height | No. | (ppm)  | (Hz)    | Height |
|-----|-------|--------|--------|-----|--------|---------|--------|
| 1   | 14.02 | 1763.1 | 0.2642 | 11  | 36.65  | 4609.8  | 0.1796 |
| 2   | 16.53 | 2078.6 | 0.1904 | 12  | 50.43  | 6342.1  | 0.1297 |
| 3   | 16.79 | 2112.2 | 0.2101 | 13  | 76.95  | 9678.3  | 0.2050 |
| 4   | 16.85 | 2119.4 | 0.2939 | 14  | 77.00  | 9684.3  | 1.0000 |
| 5   | 17.42 | 2191.4 | 0.2035 | 15  | 79.16  | 9955.4  | 0.1908 |
| 6   | 17.46 | 2196.2 | 0.2503 | 16  | 82.73  | 10405.3 | 0.1988 |
| 7   | 17.66 | 2221.4 | 0.2413 | 17  | 84.54  | 10633.2 | 0.3312 |
| 8   | 24.59 | 3092.3 | 0.4107 | 18  | 98.52  | 12390.7 | 0.1239 |
| 9   | 24.71 | 3107.9 | 0.5082 | 19  | 170.02 | 21383.1 | 0.1265 |
| 10  | 33.90 | 4263.1 | 0.2031 | 20  | 206.01 | 25909.4 | 0.1111 |

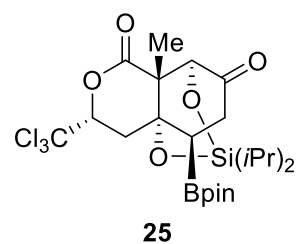

25



$^1\text{H}$  NMR,  $\text{CDCl}_3$ , 500MHz

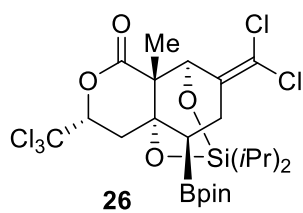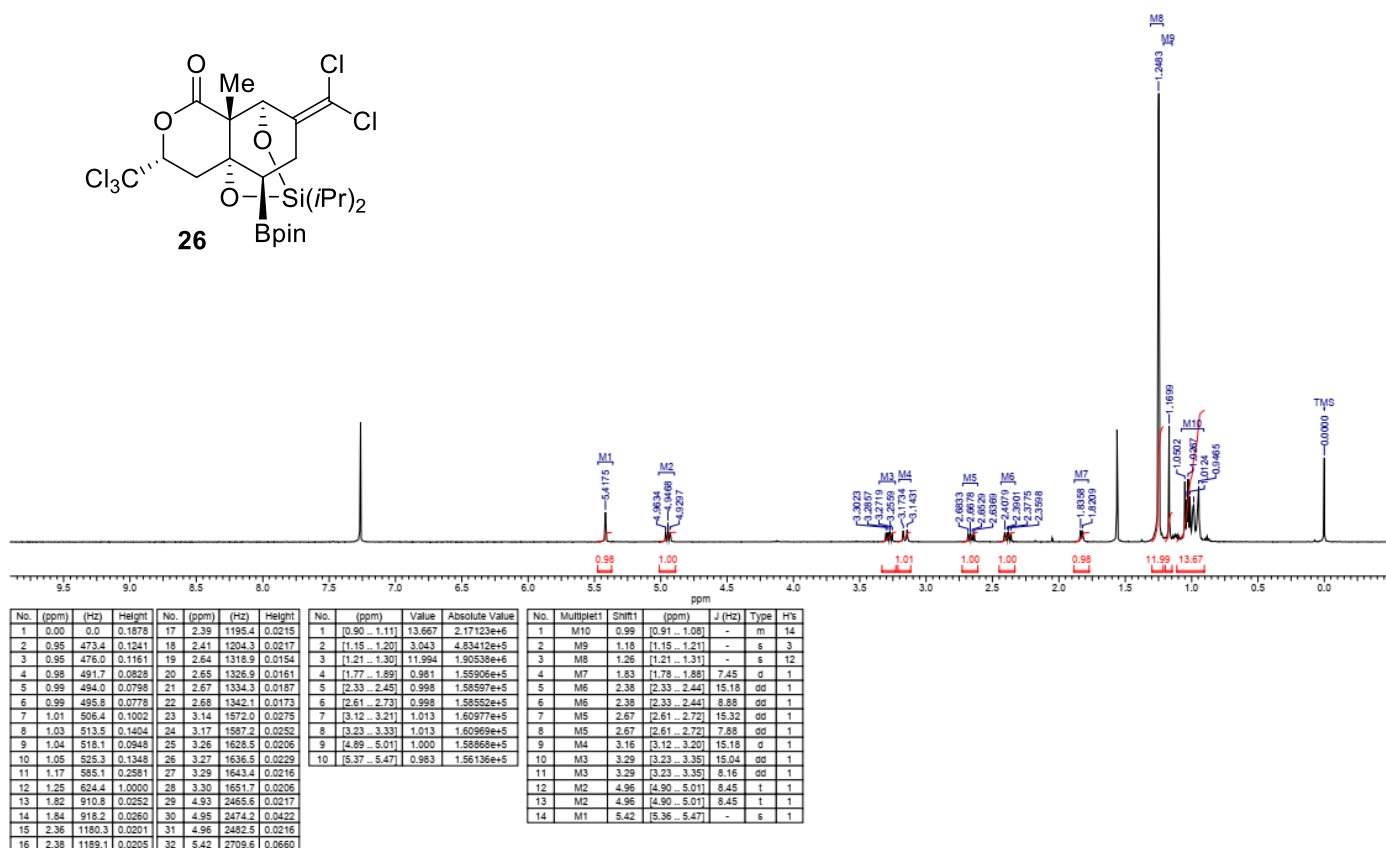

$^{13}\text{C}$  NMR,  $\text{CDCl}_3$ , 125MHz

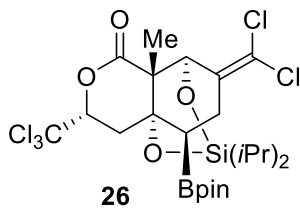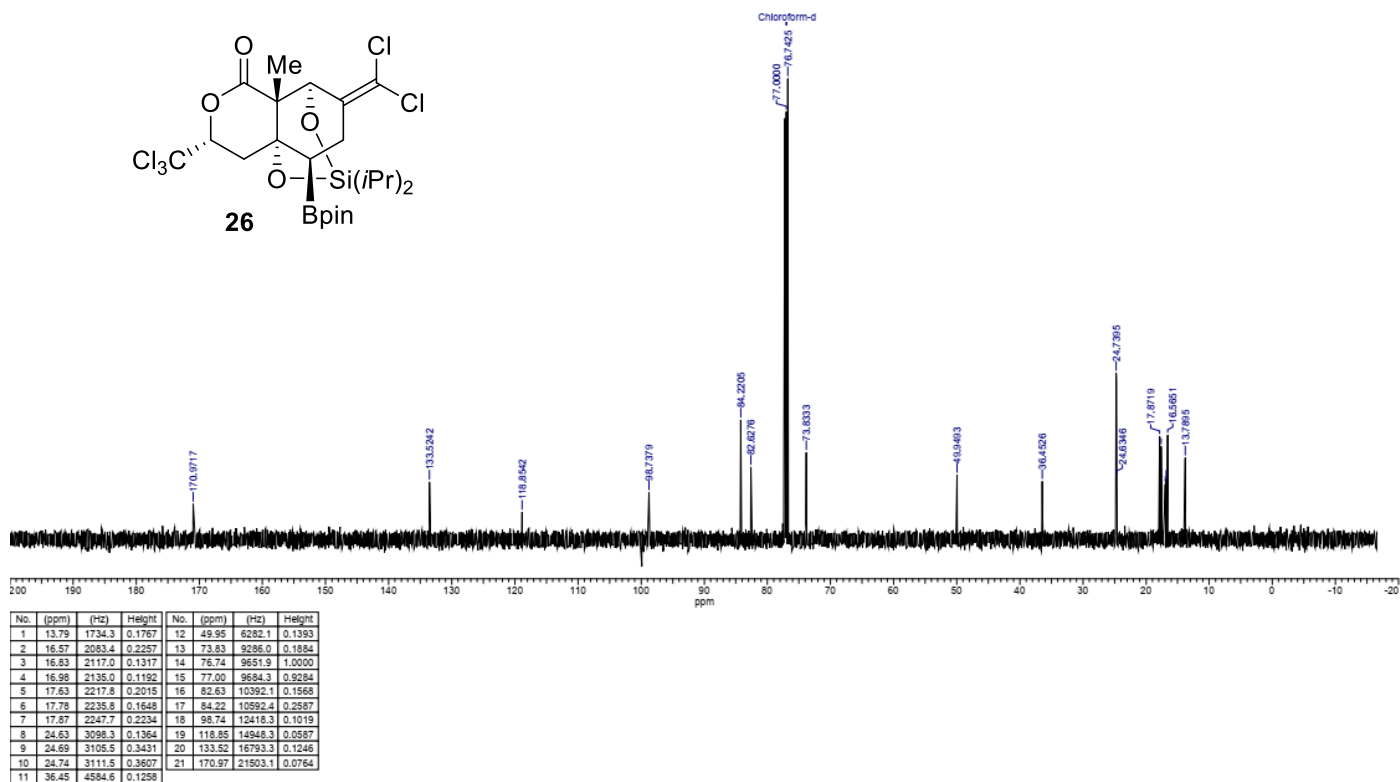

$^1\text{H}$  NMR,  $\text{CDCl}_3$ , 500MHz

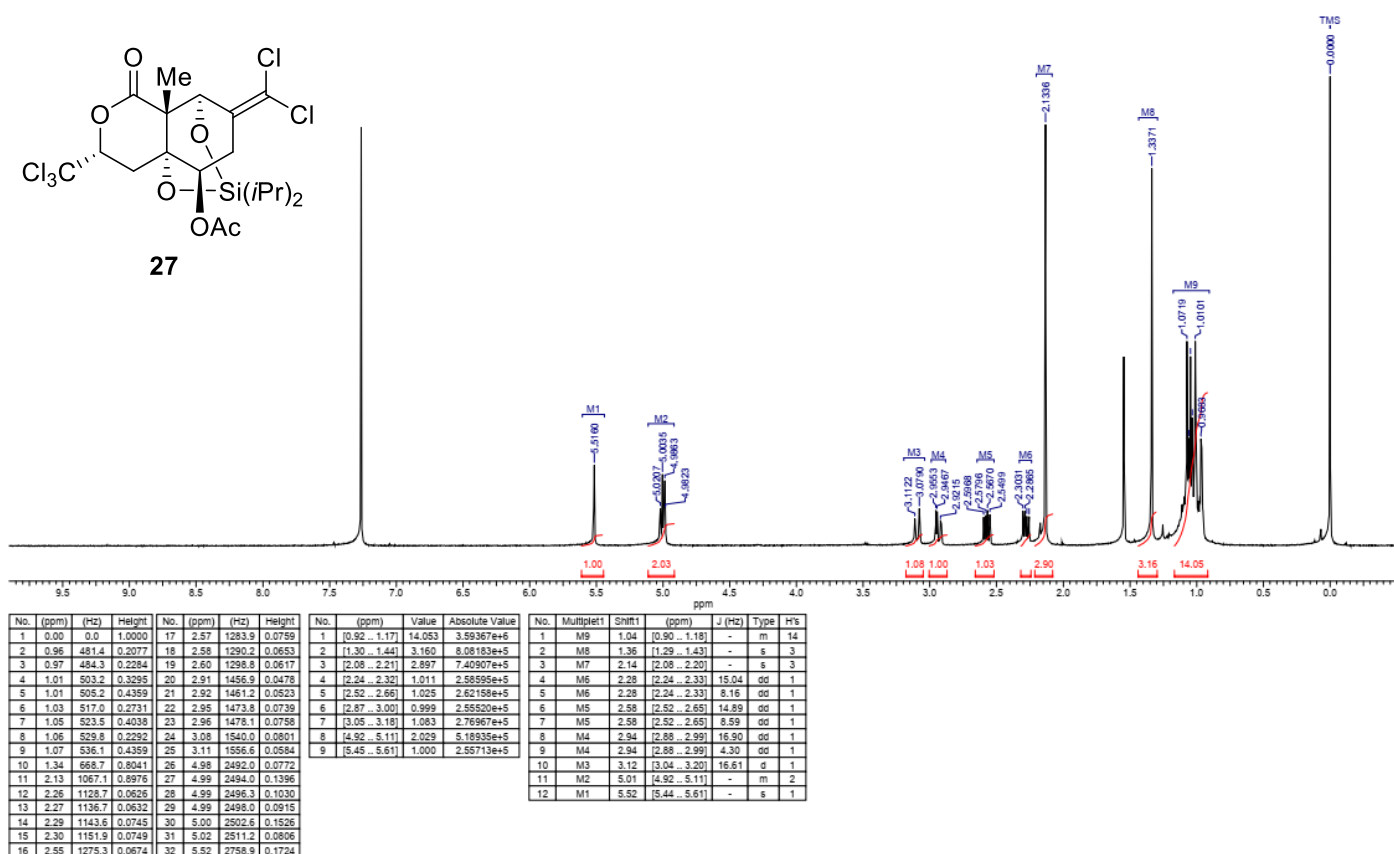

$^{13}\text{C}$  NMR,  $\text{CDCl}_3$ , 125MHz

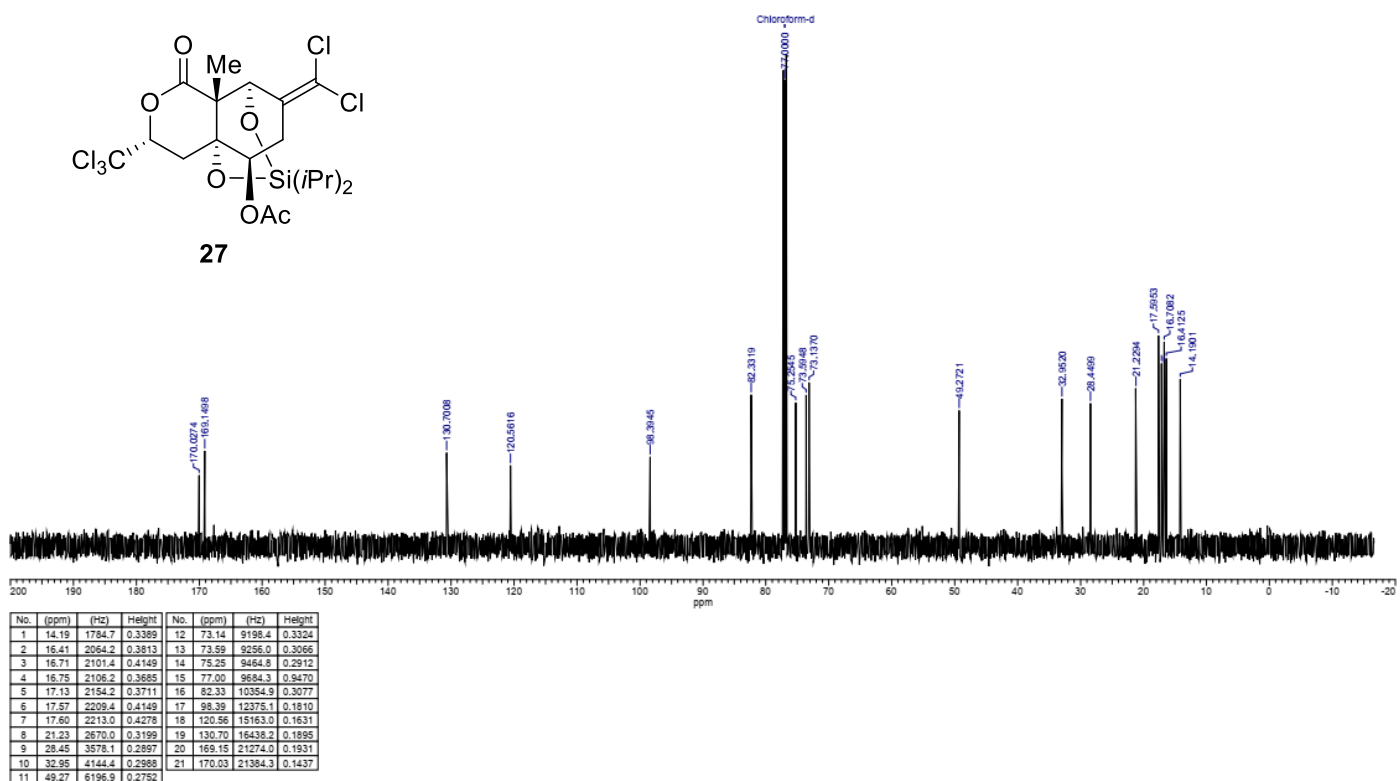

<sup>1</sup>H NMR, CDCl<sub>3</sub>, 500MHz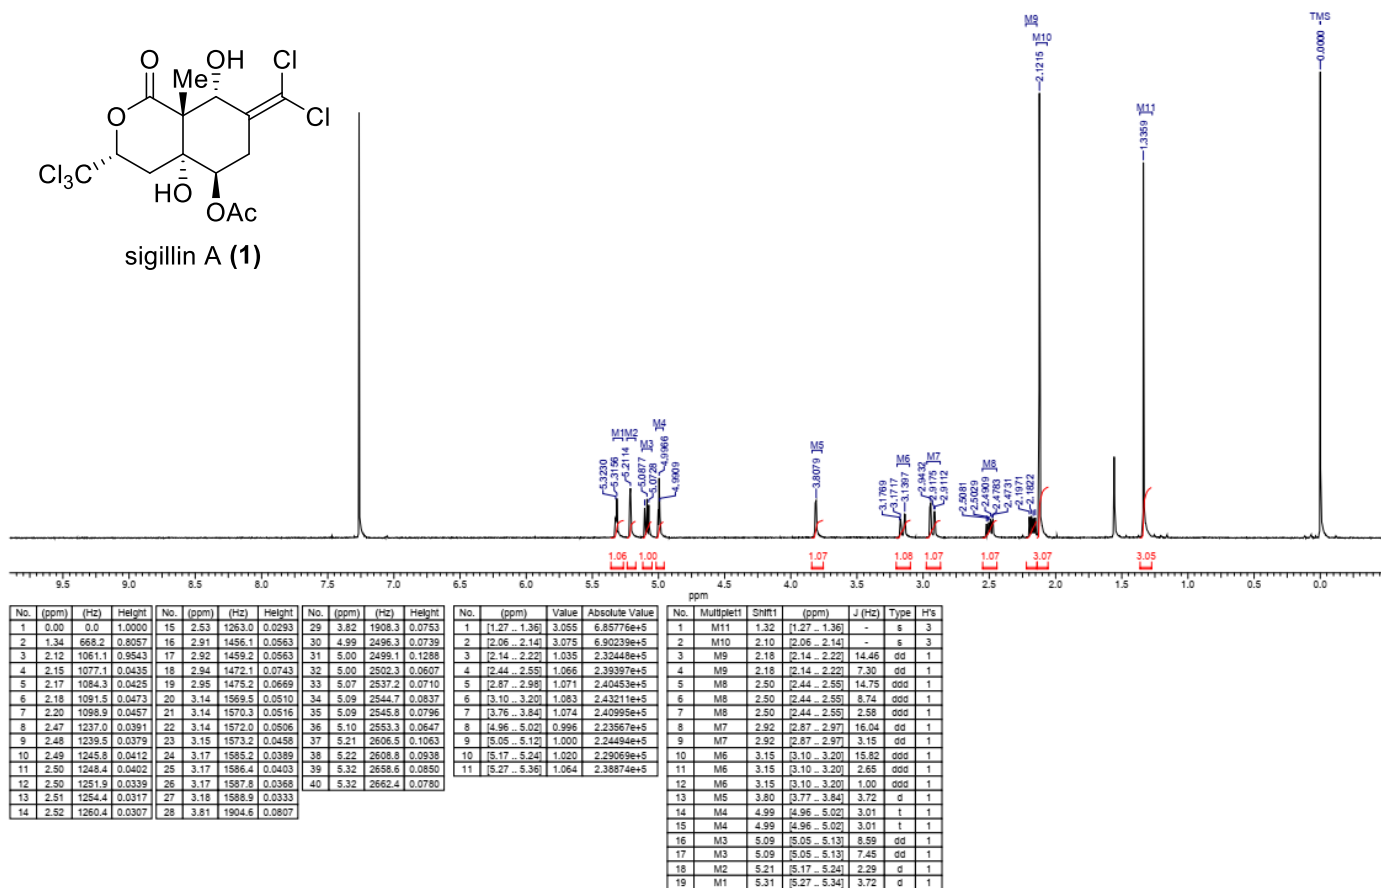 $^{13}\text{C}$  NMR,  $\text{CDCl}_3$ , 125MHz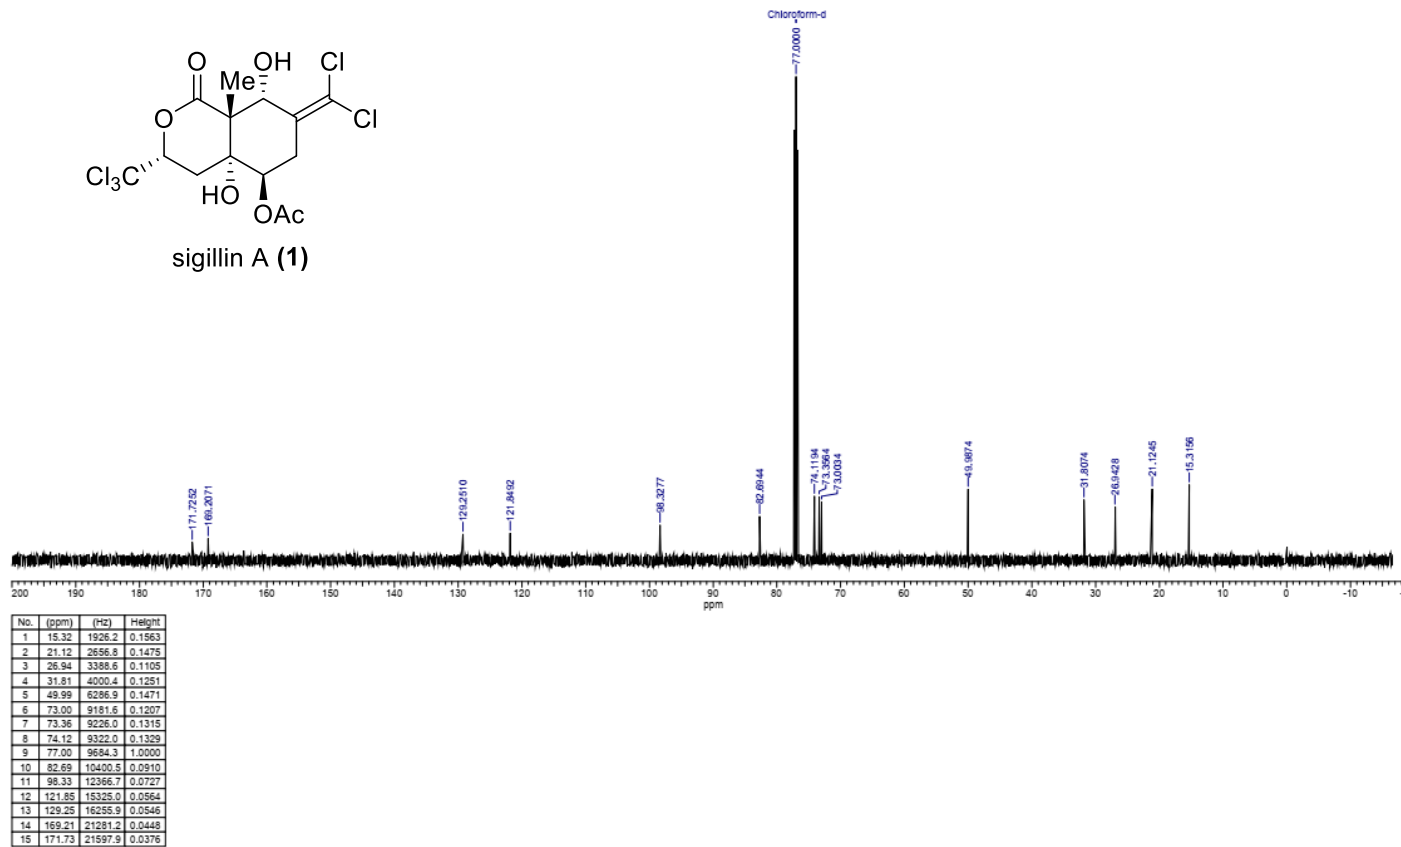

Supplement: Supplementary file 1 [file 24693617]
